# Supplementary material for: Psychiatric Status across Body Mass Index in a Mediterranean Spanish Population
Source: PLoS One. 2015 Dec 18;10(12):e0145414. doi: 10.1371/journal.pone.0145414 (PMC4686170; doi:10.1371/journal.pone.0145414)
Supplement: S1 File — (XLSX) [file pone.0145414.s001.xlsx]

## Sheet: Sheet1
PATIENT ID.	GENDER	AGE	BMI	LIVE ALONE	PAID WORK	EDUCATION	ORIGIN	FAMILY HISTORY OF OBESITY	FAMILY HISTORY OF PSYCHIATRIC DISEASE	Paranoid PD	Schizoid PD	Schizotypal PD	Histrionic PD	Narcissistic PD	Antisocial PD	Borderline PD	Avoidant PD	Dependent PD	Obsessive_compulsive PD	Squizophrenia	Mood	Anxiety	Somatoform	Factitious	Dissociative	Sexual and Gender Identity	Adjustment	Substance_Related	Anorexia	Bulimmia	EDNOS	Binge Eating
1	Female	26	19.81	No	Yes	University	Urban	No	No	No	No	No	No	No	No	No	No	No	No	No	No	No	No	No	No	No	No	No	No	No	No	No
2	Female	32	20.5	No	No	Primary	Rural	No	No	No	No	No	No	No	No	No	No	No	No	No	No	No	No	No	No	No	No	No	No	No	No	No
3	Female	45	22.3	No	No	Secondary	Urban	No	No	No	No	Yes	No	No	No	No	No	No	No	No	No	No	No	No	No	No	No	No	No	No	No	No
4	Female	37	21.7	No	No	Primary	Urban	No	No	No	No	No	No	No	No	No	No	No	No	No	No	No	No	No	No	No	No	No	No	No	No	No
5	Female	41	22.9	No	Yes	University	Urban	No	No	No	No	No	No	No	No	No	No	No	No	No	No	No	No	No	No	No	No	No	No	No	No	No
6	Female	45	22.6	No	No		Urban	No	Yes	No	No	No	No	No	No	No	No	No	No	No	No	No	No	No	No	No	No	No	No	No	No	No
7	Female	47	23.4	No	No	Primary	Urban	No	No	No	No	No	No	No	No	No	No	No	No	No	No	No	No	No	No	No	No	No	No	No	No	No
8	Female	62	24.5	No	Yes	University	Urban	No	No	No	No	No	No	No	No	No	No	No	No	No	No	No	No	No	No	No	No	No	No	No	No	No
9	Female	23	19.6	No	Yes	University	Urban	No	No	No	No	No	No	No	No	No	No	No	No	No	No	No	No	No	No	No	No	No	No	No	No	No
10	Female	56	23.7	No	No		Urban	No	No	No	No	Yes	No	No	No	No	No	No	No	No	No	No	No	No	No	No	No	No	No	No	No	No
11	Female	59	24.8	Yes	Yes	Secondary	Urban	Yes	Yes	No	No	No	No	No	No	No	No	No	No	No	No	No	No	No	No	No	No	No	No	No	No	No
12	Female	47	24.2	No	Yes	Primary	Urban	No	No	No	No	No	No	No	No	No	No	No	No	No	No	No	No	No	No	No	No	No	No	No	No	No
13	Female	48	23.8	No	No	University	Rural	No	No	No	No	No	No	No	No	No	No	No	No	No	No	No	No	No	No	No	No	No	No	No	No	No
14	Female	27	24.9	No	No	Secondary	Urban	No	No	No	No	No	No	No	No	No	No	No	No	No	No	No	No	No	No	No	No	No	No	No	No	No
15	Female	33	24.7	No	No	Primary	Urban	No	No	No	No	Yes	No	No	No	No	No	No	No	No	No	No	No	No	No	No	No	No	No	No	No	No
16	Female	41	23.6	No	Yes	Primary	Urban	No	No	No	No	No	No	No	No	No	No	No	No	No	No	No	No	No	No	No	No	No	No	No	No	No
17	Female	35	22.7	No	No	Secondary	Urban	No	No	No	No	No	No	No	No	No	No	No	No	No	No	Yes	No	No	No	No	No	No	No	No	No	No
18	Female	38	21.8	No	Yes	Primary	Urban	No	No	No	No	No	No	No	No	No	No	No	No	No	No	No	No	No	No	No	No	No	No	No	No	No
19	Female	51	23.9	No	No		Urban	No	No	No	No	No	No	No	No	No	No	No	No	No	No	No	No	No	No	No	No	No	No	No	No	No
20	Female	42	22.9	No	No	Primary	Urban	No	No	No	No	No	No	No	No	No	No	No	No	No	No	No	No	No	No	No	No	No	No	Yes	No	No
21	Female	27	21.6	No	Yes	Primary	Urban	No	No	No	No	No	No	No	No	No	No	No	No	No	No	No	No	No	No	No	No	No	No	No	No	No
22	Female	37	22.7	No	No	Secondary	Urban	No	No	No	No	No	No	No	No	No	No	No	No	No	No	No	No	No	No	No	No	No	No	No	No	No
23	Female	38	23.8	Yes	Yes	Primary	Urban	No	No	No	No	No	No	No	No	No	No	No	No	No	No	No	No	No	No	No	No	No	No	No	Yes	No
24	Female	31	23.7	No	No	Primary	Urban	No	No	No	No	No	No	No	No	No	No	No	No	No	No	No	No	No	No	No	No	No	No	No	No	No
25	Female	40	24.6	No	Yes	Secondary	Urban	Yes	Yes	No	No	No	No	No	No	No	No	No	No	No	No	Yes	No	No	No	No	No	Yes	No	No	No	No
26	Female	23	23.5	No	No	Primary	Urban	No	No	No	No	No	No	No	No	Yes	No	No	No	No	No	No	No	No	No	No	No	No	No	No	No	No
27	Female	49	22.6	No	No		Urban	No	No	No	No	No	No	No	No	No	No	No	No	No	No	No	No	No	No	No	Yes	No	No	No	No	No
28	Female	61	23.4	No	Yes		Urban	No	No	No	No	No	No	No	No	No	No	No	No	No	No	No	No	No	No	No	No	No	No	No	No	No
29	Female	37	24.2	No	No	Primary	Urban	No	No	No	No	No	No	No	No	No	No	No	No	No	No	No	No	No	No	No	No	No	No	No	No	No
30	Female	39	24.1	No	Yes	Primary	Urban	No	No	No	No	No	No	No	No	No	No	No	No	No	No	No	No	No	No	No	No	No	No	No	No	No
31	Female	42	24.9	No	Yes	University	Urban	No	No	No	No	No	No	No	No	No	No	No	No	No	No	No	No	No	No	No	No	No	No	No	No	No
32	Female	34	24.5	No	Yes	University	Urban	No	No	No	No	No	No	No	No	No	No	No	No	No	No	No	No	No	No	No	No	No	No	No	No	No
33	Female	47	22.7	No	Yes	Secondary	Urban	No	No	No	No	No	No	No	No	No	No	No	No	No	No	No	No	No	No	No	No	No	No	No	No	No
34	Female	29	23.6	No	Yes	Secondary	Urban	No	No	No	No	No	No	No	No	No	No	No	No	No	No	No	No	No	No	No	No	No	No	No	No	No
35	Female	53	20.9	No	No		Urban	No	No	No	No	Yes	No	No	No	No	No	No	No	No	No	Yes	No	No	No	No	No	No	No	No	No	No
36	Male	53	23.4	No	Yes		Rural	No	No	No	No	No	No	No	No	No	No	No	No	No	No	No	No	No	No	No	No	No	No	No	No	No
37	Male	54	24.3	No	Yes	Secondary	Urban	No	No	No	No	No	No	No	No	No	No	No	No	No	No	No	No	No	No	No	No	No	No	No	No	No
38	Male	27	23.2	No	Yes	University	Urban	Yes	Yes	No	No	No	No	No	No	No	No	No	No	No	No	No	No	No	No	No	No	No	No	No	No	No
39	Male	31	21.4	No	Yes	University	Urban	No	No	No	No	No	No	No	No	No	No	No	No	No	No	Yes	No	No	No	No	No	No	No	No	No	No
40	Male	36	23.2	No	Yes	Primary	Rural	No	No	No	No	No	No	No	No	No	No	No	No	No	No	No	No	No	No	No	No	No	No	No	No	No
41	Male	41	22.2	No	Yes	Secondary	Urban	No	No	No	No	No	No	No	No	No	No	No	No	No	No	No	No	No	No	No	No	Yes	No	No	No	No
42	Male	25	21.4	No	Yes	Primary	Urban	No	No	No	No	No	No	No	No	No	No	No	No	No	No	No	No	No	No	No	No	No	No	No	No	No
43	Male	32	22.3	No	No	University	Urban	No	No	Yes	No	No	No	No	No	No	No	No	No	No	No	No	No	No	No	No	No	No	No	No	No	No
44	Male	37	21.3	No	Yes	Secondary	Urban	No	No	No	No	No	No	No	No	No	No	No	No	No	No	No	No	No	No	No	No	No	No	No	No	No
45	Male	43	22.4	No	Yes	University	Rural	No	No	No	No	No	No	No	No	No	No	No	No	No	No	No	No	No	No	No	No	No	No	No	No	No
46	Male	62	20.6	No	No	Secondary	Urban	No	No	No	No	No	No	No	No	No	No	No	No	No	No	No	No	No	No	No	No	No	No	No	No	No
47	Male	53	21.3	Yes	Yes	Secondary	Rural	No	No	No	No	No	No	No	No	No	No	No	No	No	No	No	No	No	No	No	No	No	No	No	No	No
48	Male	43	19.8	No	Yes	Secondary	Urban	No	No	No	No	No	No	No	No	No	No	No	No	No	No	No	No	No	No	No	No	No	No	No	No	No
49	Male	39	20.4	No	Yes	University	Urban	No	No	No	No	No	No	No	No	No	No	No	No	No	No	No	No	No	No	No	No	No	No	No	No	No
50	Male	40	21.3	No	No	Primary	Urban	No	No	No	No	No	No	No	No	No	No	No	No	No	No	No	No	No	No	No	No	No	No	No	No	No
51	Male	42	20.9	No	Yes	Secondary	Urban	No	Yes	No	No	No	No	No	No	No	No	No	No	No	No	No	No	No	No	No	No	No	No	No	No	No
52	Male	41	20.5	No	No	Primary	Urban	No	No	No	No	No	No	No	No	No	No	No	No	No	No	No	No	No	No	No	No	No	No	No	No	No
53	Male	29	23.3	No	No	Primary	Urban	No	No	No	No	No	No	No	No	No	No	No	Yes	No	No	No	No	No	No	No	No	No	No	No	No	No
54	Male	39	24.2	No	Yes	University	Urban	No	No	No	No	No	No	No	No	No	No	No	No	No	No	No	No	No	No	No	No	No	No	No	No	No
55	Male	40	22.3	No	No	Primary	Urban	No	No	No	No	No	No	No	No	No	No	No	No	No	No	No	No	No	No	No	No	No	No	No	No	No
56	Male	41	18.5	No	Yes	Secondary	Urban	No	No	No	No	No	No	No	No	No	No	No	No	No	No	No	No	No	No	No	No	No	No	No	No	No
57	Male	42	23.5	No	Yes	Primary	Urban	No	No	No	No	No	No	No	No	No	No	No	No	No	No	No	No	No	No	No	No	No	No	No	No	No
58	Male	43	21.2	No	Yes	Secondary	Urban	No	No	No	No	No	No	No	No	No	No	No	No	No	No	No	No	No	No	No	No	No	No	No	No	No
59	Male	56	21.6	Yes	No		Rural	No	No	No	No	No	No	No	No	No	No	No	No	No	No	No	No	No	No	No	No	No	No	No	No	No
60	Male	27	24.5	No	Yes	Secondary	Urban	No	No	No	No	No	No	No	No	No	No	No	No	No	No	No	No	No	No	No	No	No	No	No	No	No
61	Female	35	29.5	Yes	No	University	Urban	Yes	Yes	No	No	Yes	No	No	No	No	No	Yes	No	No	Yes	No	No	No	No	No	No	No	No	No	No	No
62	Female	30	28.3	No	Yes	University	Rural	No	No	No	No	Yes	No	No	No	No	No	No	No	No	No	No	No	No	No	No	No	No	No	No	No	No
63	Female	51	27.2	No	No	Secondary	Urban	No	No	No	No	No	No	No	No	No	No	No	No	No	No	No	No	No	No	No	No	No	No	No	No	No
64	Female	50	29.3	No	Yes	Primary	Urban	Yes	Yes	No	No	No	No	No	No	No	No	No	No	No	No	Yes	No	No	No	No	No	Yes	No	No	No	No
65	Female	61	29.1	No	Yes	Secondary	Urban	No	No	No	No	No	No	No	No	No	No	No	No	No	No	No	No	No	No	No	No	No	No	No	No	No
66	Female	27	28.3	No	No	Primary	Urban	No	No	No	No	No	No	No	No	No	No	No	No	No	No	No	No	No	No	No	No	No	No	No	No	No
67	Female	34	27.8	No	No	Primary	Urban	No	No	No	No	No	No	No	No	No	No	No	No	No	No	No	No	No	No	No	No	No	No	No	No	No
68	Female	56	26.9	No	Yes	Secondary	Urban	No	No	No	No	No	No	No	No	No	No	No	No	No	No	No	No	No	No	No	No	No	No	No	No	No
69	Female	38	27.2	No	No	Primary	Urban	No	No	No	No	No	No	No	No	No	No	No	No	No	No	No	No	No	No	No	No	No	No	No	No	No
70	Female	43	25.5	No	No	University	Rural	No	No	No	No	No	No	No	No	No	No	No	No	No	No	No	No	No	No	No	No	No	No	No	No	No
71	Female	29	27.3	No	Yes	Secondary	Urban	No	No	No	No	No	No	No	No	No	No	No	No	No	No	No	No	No	No	No	No	No	No	No	No	No
72	Female	35	27.6	Yes	No	Primary	Urban	No	No	No	No	Yes	No	No	No	No	No	No	No	No	No	No	No	No	No	No	No	No	No	No	No	No
73	Female	39	28.3	No	Yes	Secondary	Urban	No	No	No	No	No	No	No	No	No	No	No	No	No	No	No	No	No	No	No	No	No	No	No	No	No
74	Female	47	29.8	No	No	Primary	Urban	Yes	No	No	No	No	No	No	No	No	No	No	No	No	No	No	No	No	No	No	No	Yes	No	No	No	No
75	Female	53	27.9	No	No	Primary	Urban	No	Yes	No	No	No	No	No	No	No	No	No	No	No	No	No	No	No	No	No	No	No	No	No	No	No
76	Female	61	28.5	No	Yes	Secondary	Urban	No	No	No	No	No	No	No	No	No	No	No	Yes	No	No	No	No	No	No	No	Yes	No	No	No	No	Yes
77	Female	63	28.7	Yes	Yes	Primary	Urban	No	No	No	No	No	No	No	No	No	No	No	No	No	No	No	No	No	No	No	No	No	No	No	No	No
78	Female	39	28.9	No	No	University	Rural	No	No	No	No	No	No	No	No	No	No	No	No	No	Yes	No	No	No	No	No	No	No	No	No	No	No
79	Female	41	27.3	No	No	Secondary	Urban	No	No	No	No	No	No	No	No	No	No	No	No	No	No	No	No	No	No	No	No	No	No	No	No	No
80	Female	29	26.9	No	Yes	Primary	Urban	No	No	No	No	No	No	No	No	No	No	No	No	No	No	No	No	No	No	No	No	No	No	No	No	No
81	Female	35	27.6	Yes	No	University	Urban	No	No	No	No	No	No	No	No	No	No	No	No	No	No	No	No	No	No	No	No	No	No	No	No	No
82	Female	39	25.1	No	Yes		Urban	No	No	No	No	No	No	No	No	No	No	No	No	No	No	No	No	No	No	No	No	No	No	No	No	No
83	Female	43	26.2	No	No		Urban	No	No	No	No	No	No	No	No	No	No	No	No	No	No	No	No	No	No	No	No	No	No	No	No	No
84	Female	45	28.3	No	No	Secondary	Urban	No	No	No	No	No	No	No	No	No	No	No	No	No	No	No	No	No	No	No	No	No	No	No	No	No
85	Female	46	29.8	No	Yes	Primary	Urban	Yes	No	No	No	No	No	No	No	No	No	No	Yes	No	No	No	No	No	No	No	No	No	No	No	No	Yes
86	Female	64	26.4	No	No	Primary	Urban	No	No	No	No	No	No	No	No	No	No	No	No	No	No	No	No	No	No	No	No	No	No	No	No	No
87	Female	26	27.3	No	Yes	University	Urban	No	No	No	No	No	No	No	No	No	No	No	No	No	Yes	No	No	No	No	No	No	No	No	No	No	No
88	Female	33	27.4	No	No	University	Urban	No	No	No	No	No	No	No	No	No	No	No	No	No	No	No	No	No	No	No	No	No	No	No	No	No
89	Female	41	25.5	No	No	Secondary	Urban	No	No	No	No	No	No	No	No	No	No	No	No	No	No	No	No	No	No	No	No	No	No	No	No	No
90	Female	40	25.7	No	Yes	Secondary	Urban	No	No	No	No	No	No	No	No	No	No	No	No	No	No	No	No	No	No	No	No	No	No	No	No	No
91	Female	38	27.3	No	Yes	Primary	Urban	No	No	No	No	No	No	No	No	No	No	No	No	No	No	No	No	No	No	No	No	No	No	No	No	No
92	Female	45	28.2	No	No	Secondary	Urban	No	No	No	No	No	No	No	No	No	No	No	No	No	No	No	No	No	No	No	No	No	No	No	No	No
93	Female	63	29.6	Yes	Yes		Urban	Yes	Yes	No	No	No	No	No	No	No	No	No	No	No	No	No	No	No	No	No	Yes	No	No	No	No	Yes
94	Female	47	27.3	Yes	No	Secondary	Rural	No	No	No	No	No	No	No	No	No	No	No	No	No	No	No	No	No	No	No	No	No	No	No	No	No
95	Female	35	27.4	No	Yes		Urban	No	No	No	No	No	No	No	No	No	No	No	No	No	Yes	No	No	No	No	No	No	No	No	No	No	No
96	Female	37	28.5	No	No	University	Urban	Yes	Yes	No	No	No	No	No	No	No	No	No	No	No	No	No	No	No	No	No	No	No	No	No	No	No
97	Female	63	25.6	No	No		Urban	No	No	No	No	No	No	No	No	No	No	No	No	No	No	No	No	No	No	No	No	No	No	No	No	No
98	Female	45	26.7	No	Yes		Urban	No	No	No	No	No	No	No	No	No	No	No	No	No	No	No	No	No	No	No	No	No	No	No	No	No
99	Male	33	27.4	No	Yes	Secondary	Urban	No	No	No	No	No	No	No	No	No	No	No	No	No	No	Yes	No	No	No	No	No	No	No	No	No	No
100	Male	61	26.2	No	Yes	Primary	Rural	No	No	No	No	No	No	No	No	No	No	No	No	No	No	No	No	No	No	No	No	No	No	No	No	No
101	Male	63	25.7	Yes	No	Secondary	Urban	No	No	No	No	No	No	No	No	No	No	No	No	No	No	No	No	No	No	No	No	No	No	No	No	No
102	Male	39	25.9	No	Yes	Secondary	Rural	No	No	No	No	No	No	No	No	No	No	No	No	No	No	No	No	No	No	No	No	No	No	No	No	No
103	Male	41	24.3	No	No	University	Urban	No	No	No	No	No	No	No	No	No	No	No	No	No	No	No	No	No	No	No	No	No	No	No	No	No
104	Male	29	28.5	No	Yes	Secondary	Urban	Yes	Yes	No	No	No	No	No	No	No	No	No	Yes	No	No	No	No	No	No	No	No	Yes	No	No	No	No
105	Male	35	25.8	No	Yes	Secondary	Urban	No	No	No	No	No	No	No	No	No	No	No	No	No	No	No	No	No	No	No	No	No	No	No	No	No
106	Male	39	26.2	No	Yes	Secondary	Urban	No	Yes	No	No	No	No	No	No	No	No	No	No	No	No	No	No	No	No	No	No	No	No	No	No	No
107	Male	43	27.1	No	Yes	Primary	Urban	No	No	No	No	No	No	No	No	No	No	No	No	No	No	No	No	No	No	No	No	No	No	No	No	No
108	Male	46	28.2	No	Yes	Secondary	Rural	No	Yes	No	No	No	No	No	No	No	No	No	No	No	No	No	No	No	No	No	No	No	No	No	No	No
109	Male	48	25.8	No	Yes	Secondary	Urban	No	No	No	No	No	No	No	No	No	No	No	No	No	No	No	No	No	No	No	No	No	No	No	No	No
110	Male	51	25.3	No	Yes	Primary	Urban	No	No	No	No	No	No	No	No	No	No	No	No	No	No	No	No	No	No	No	No	No	No	No	No	No
111	Male	62	26.4	Yes	Yes		Rural	No	No	No	No	No	No	No	No	No	No	No	No	No	No	No	No	No	No	No	No	No	No	No	No	No
112	Male	37	27.5	No	No	University	Urban	No	No	No	No	No	No	No	No	No	No	No	No	No	No	No	No	No	No	No	No	No	No	No	No	No
113	Male	45	28.3	No	Yes	Secondary	Urban	Yes	No	Yes	No	No	No	No	No	No	No	No	No	No	No	Yes	No	No	No	No	No	No	No	No	No	No
114	Male	62	26.8	No	Yes		Urban	No	No	No	No	No	No	No	No	No	No	No	No	No	No	No	No	No	No	No	No	No	No	No	No	No
115	Male	33	27.1	No	Yes	University	Urban	No	No	No	No	No	No	No	No	No	No	No	No	No	No	No	No	No	No	No	No	No	No	No	No	No
116	Male	35	27.5	No	No	Secondary	Urban	No	No	No	No	No	No	No	No	No	No	No	No	No	No	No	No	No	No	No	No	No	No	No	No	No
117	Male	33	28.6	No	No	Primary	Urban	No	No	No	No	No	No	No	No	No	No	No	No	No	No	No	No	No	No	No	No	No	No	No	No	Yes
118	Male	42	29.9	No	Yes	Secondary	Urban	Yes	Yes	No	No	No	No	No	No	No	No	No	Yes	No	No	No	No	No	No	No	Yes	No	No	No	No	Yes
119	Male	50	26.2	Yes	Yes	Primary	Urban	No	No	No	No	No	No	No	No	No	No	No	No	No	No	No	No	No	No	No	No	No	No	No	No	No
120	Male	63	28.1	No	No		Urban	No	No	No	No	No	No	No	No	No	No	No	No	No	No	No	No	No	No	No	No	No	No	No	No	No
121	Female	31	33.7	No	Yes	University	Urban	No	No	No	No	No	No	No	No	No	No	No	No	No	No	Yes	No	No	No	No	No	No	No	No	Yes	Yes
122	Female	53	38.2	Yes	No		Rural	No	No	No	No	No	No	No	No	No	No	No	No	No	No	No	No	No	No	No	No	No	No	No	No	Yes
123	Female	48	40.1	No	No		Rural	Yes	Yes	No	No	No	No	No	No	No	No	No	No	No	No	Yes	No	No	No	No	No	Yes	No	No	Yes	Yes
124	Female	47	39.9	No	No		Urban	Yes	No	No	No	No	No	No	No	No	No	No	No	No	No	No	No	No	No	No	No	No	No	No	No	No
125	Female	53	38.7	No	No	Secondary	Urban	Yes	No	No	No	No	No	No	No	No	No	No	No	No	No	No	No	No	No	No	No	No	No	No	No	Yes
126	Female	54	35.3	No	Yes		Urban	No	No	No	No	No	No	No	No	No	No	No	No	No	No	No	No	No	No	No	No	No	No	No	No	No
127	Female	39	33.4	No	No	Primary	Urban	No	No	No	No	No	No	No	No	No	No	No	No	No	No	No	No	No	No	No	No	No	No	No	No	No
128	Female	41	35.1	No	Yes	University	Urban	No	No	No	No	No	No	No	No	No	No	No	No	No	No	No	No	No	No	No	No	No	No	No	No	No
129	Female	45	36.7	No	No	Secondary	Urban	No	No	No	No	No	No	No	No	No	No	No	No	No	No	No	No	No	No	No	No	No	No	No	No	No
130	Female	38	38.9	Yes	No	Primary	Urban	No	Yes	No	No	No	No	No	No	No	No	No	No	No	No	No	No	No	No	No	Yes	Yes	No	No	Yes	Yes
131	Female	25	35.3	No	Yes	Primary	Rural	No	No	No	No	No	No	No	No	No	No	No	No	No	No	No	No	No	No	No	No	No	No	No	No	No
132	Female	61	38.7	No	No		Urban	No	No	No	No	No	No	No	No	No	No	No	No	No	No	No	No	No	No	No	No	No	No	No	No	No
133	Female	39	36.8	No	No	Primary	Urban	No	No	No	No	No	No	No	No	No	No	No	No	No	No	No	No	No	No	No	No	No	No	No	No	No
134	Female	47	37.4	No	No		Urban	No	No	No	No	No	No	No	No	No	No	No	No	No	No	No	No	No	No	No	No	No	No	No	No	No
135	Female	53	39.4	No	No		Urban	Yes	Yes	No	No	No	No	No	No	No	No	No	No	No	No	No	No	No	No	No	Yes	Yes	No	No	Yes	Yes
136	Female	33	31.3	No	Yes	Primary	Urban	No	No	No	No	No	No	No	No	No	No	No	No	No	No	No	No	No	No	No	No	No	No	No	No	Yes
137	Female	29	35.8	No	No	University	Urban	No	No	No	No	No	No	No	No	No	No	No	Yes	No	No	No	No	No	No	No	No	No	No	No	No	No
138	Female	44	37.9	No	No	Primary	Urban	No	No	No	No	No	No	No	No	No	No	No	No	No	No	No	No	No	No	No	No	No	No	No	No	No
139	Female	41	38.7	Yes	No		Rural	No	No	No	No	No	No	No	No	No	No	No	No	No	No	No	No	No	No	No	No	No	No	No	No	No
140	Female	38	39.1	No	No	Secondary	Urban	No	Yes	No	No	Yes	No	No	No	No	No	No	No	No	No	Yes	No	No	No	No	Yes	No	No	No	No	Yes
141	Female	39	41.3	Yes	No	Primary	Rural	Yes	Yes	No	No	No	No	No	No	No	No	No	Yes	No	No	No	No	No	No	No	No	No	No	No	No	No
142	Female	46	42.8	No	No		Urban	Yes	Yes	No	No	No	No	No	No	No	No	No	No	No	No	No	No	No	No	No	No	No	No	No	No	Yes
143	Female	28	39.7	No	No	University	Urban	No	No	No	No	Yes	No	No	No	No	No	No	No	No	No	No	No	No	No	No	No	No	No	No	No	No
144	Female	62	36.3	No	Yes		Urban	No	No	No	No	No	No	No	No	No	No	No	Yes	No	No	Yes	No	No	No	No	No	No	No	No	No	No
145	Female	57	38.7	No	No		Urban	No	Yes	No	No	No	No	No	No	No	No	No	No	No	No	No	No	No	No	No	Yes	No	No	No	No	Yes
146	Female	45	37.9	No	No	Secondary	Urban	No	No	No	No	Yes	No	No	No	No	No	No	No	No	No	Yes	No	No	No	No	No	No	No	No	No	No
147	Female	38	38.5	No	Yes	Primary	Rural	No	No	No	No	No	No	No	No	No	No	No	No	No	No	No	No	No	No	No	No	No	No	No	No	No
148	Female	41	43.1	No	No	Primary	Urban	No	Yes	No	No	Yes	No	No	No	No	No	No	No	No	No	Yes	No	No	No	No	Yes	No	No	No	No	Yes
149	Female	46	39.8	Yes	No		Urban	Yes	Yes	No	No	No	No	No	No	No	No	No	No	No	No	No	No	No	No	No	No	No	No	No	No	No
150	Female	39	38.3	No	No	Primary	Urban	No	No	No	No	No	No	No	No	No	No	No	No	No	No	No	No	No	No	No	No	No	No	No	No	No
151	Female	25	43.2	Yes	No		Urban	Yes	No	No	No	No	No	No	No	No	No	No	No	No	No	No	No	No	No	No	Yes	Yes	No	No	No	Yes
152	Female	38	31.8	No	Yes		Urban	No	No	No	No	No	No	No	No	No	No	No	No	No	No	No	No	No	No	No	No	No	No	No	No	No
153	Female	39	36.7	No	No		Urban	No	No	No	No	No	No	No	No	No	No	No	No	No	No	No	No	No	No	No	No	No	No	No	No	No
154	Female	46	38.3	Yes	No		Urban	No	No	No	No	No	No	No	No	No	No	No	No	No	No	No	No	No	No	No	No	No	No	No	No	No
155	Female	53	39.1	No	No		Urban	No	Yes	No	No	No	No	No	No	No	No	No	No	No	No	No	No	No	No	No	No	No	No	No	No	No
156	Female	62	42.8	No	No		Urban	Yes	No	No	No	No	No	No	No	No	No	No	No	No	No	No	No	No	No	No	No	No	No	No	No	No
157	Female	59	37.3	No	No		Rural	No	Yes	No	No	No	No	No	No	No	No	No	No	No	No	No	No	No	No	No	No	No	No	No	No	Yes
158	Female	60	36.8	No	No		Urban	No	No	No	No	No	No	No	No	No	No	No	No	No	No	No	No	No	No	No	No	No	No	No	No	No
159	Female	61	35.3	No	Yes		Urban	No	No	No	No	No	No	No	No	No	No	No	No	No	No	No	No	No	No	No	No	No	No	No	No	No
160	Female	57	44.5	No	No		Urban	No	Yes	No	No	No	No	No	No	No	No	No	No	No	No	No	No	No	No	No	No	No	No	No	No	No
161	Male	59	31.2	No	Yes	University	Rural	No	No	No	No	No	No	No	No	No	No	No	No	No	No	No	No	No	No	No	No	No	No	No	No	No
162	Male	60	37.3	No	Yes	Primary	Urban	No	No	No	No	No	No	No	No	No	No	No	No	No	No	No	No	No	No	No	No	No	No	No	No	No
163	Male	39	38.9	No	No	Secondary	Urban	No	Yes	No	No	No	No	No	No	No	No	No	Yes	No	No	No	No	No	No	No	No	No	No	No	No	Yes
164	Male	40	40.1	Yes	No	University	Rural	Yes	Yes	No	No	No	No	No	No	No	No	No	No	No	No	No	No	No	No	No	No	No	No	No	No	No
165	Male	42	39.7	No	No	Primary	Urban	Yes	No	No	No	No	No	No	No	No	No	No	No	No	No	No	No	No	No	No	No	No	No	No	No	No
166	Male	55	40.3	Yes	No		Urban	Yes	No	No	No	No	No	No	No	No	No	No	No	No	No	No	No	No	No	No	No	No	No	No	No	Yes
167	Male	47	39.7	Yes	No	Primary	Urban	Yes	No	No	No	No	No	No	No	No	No	No	Yes	No	No	No	No	No	No	No	Yes	No	No	No	No	Yes
168	Male	48	36.8	No	Yes	Primary	Urban	No	No	No	No	No	No	No	No	No	No	No	No	No	No	Yes	No	No	No	No	Yes	No	No	No	No	No
169	Male	45	35.8	No	No	Secondary	Urban	No	No	No	No	No	No	No	No	No	No	No	No	No	No	No	No	No	No	No	No	No	No	No	No	No
170	Male	46	37.1	No	No	Primary	Urban	No	No	No	No	No	No	No	No	No	No	No	No	No	No	No	No	No	No	No	No	No	No	No	No	No
171	Male	39	36.3	No	No		Rural	No	No	No	No	No	No	No	No	No	No	No	No	No	No	No	No	No	No	No	No	No	No	No	No	No
172	Male	41	35.9	No	Yes	Secondary	Urban	No	No	No	No	No	No	No	No	No	No	No	No	No	No	No	No	No	No	No	Yes	No	No	No	No	Yes
173	Male	44	37.7	No	No	Primary	Urban	No	Yes	No	No	No	No	No	No	No	No	No	No	No	No	Yes	No	No	No	No	No	No	No	No	No	No
174	Male	45	33.5	No	Yes		Urban	No	No	No	No	No	No	No	No	No	No	No	No	No	No	No	No	No	No	No	No	No	No	No	No	No
175	Male	38	37.3	No	No	Primary	Urban	No	No	No	No	No	No	No	No	No	No	No	No	No	No	No	No	No	No	No	No	No	No	No	No	No
176	Male	39	42.8	No	No		Rural	Yes	Yes	Yes	No	No	No	No	No	No	No	No	No	No	No	No	No	No	No	No	No	Yes	No	No	No	Yes
177	Male	40	39.7	Yes	No		Urban	No	Yes	No	No	No	No	No	No	No	No	No	Yes	No	No	No	No	No	No	No	No	Yes	No	No	No	No
178	Male	41	36.3	No	Yes	Primary	Urban	No	No	No	No	No	No	No	No	No	No	No	No	No	No	Yes	No	No	No	No	Yes	No	No	No	No	Yes
179	Male	43	32.8	No	Yes	Secondary	Urban	No	No	No	No	No	No	No	No	No	No	No	No	No	No	No	No	No	No	No	No	No	No	No	No	No
180	Male	45	36.1	No	Yes		Urban	No	No	No	No	No	No	No	No	No	No	No	No	No	No	No	No	No	No	No	No	No	No	No	No	No
181	Male	42	23.2	No	No	Primary	Urban	No	No	No	No	No	No	No	No	No	No	No	Yes	No	No	No	No	No	No	No	No	No	No	No	No	No
182	Male	28	21.6	No	Yes	Secondary	Urban	No	No	No	No	No	No	No	No	No	No	No	No	No	No	No	No	No	No	No	No	No	No	No	No	No
183	Male	45	20.4	No	Yes	University	Rural	No	No	No	No	No	No	No	No	No	No	No	No	No	No	No	No	No	No	No	No	Yes	No	No	No	No
184	Male	37	21.3	No	No	Secondary	Urban	No	No	No	No	No	No	No	No	No	No	No	No	No	No	No	No	No	No	No	No	No	No	No	No	No
185	Male	51	23.4	Yes	Yes	University	Urban	Yes	No	No	No	No	No	No	No	No	No	No	No	No	No	No	No	No	No	No	No	No	No	No	No	No
186	Male	33	21.7	No	Yes	Primary	Urban	No	Yes	No	No	No	No	No	No	No	No	No	No	No	No	No	No	No	No	No	No	No	No	No	No	No
187	Male	55	20.8	No	Yes	Secondary	Rural	No	No	No	No	No	No	No	No	No	No	No	No	No	No	No	No	No	No	No	No	No	No	No	No	No
188	Male	39	24.7	No	No	University	Urban	No	No	No	No	No	No	No	No	No	No	No	No	No	No	No	No	No	No	No	No	No	No	No	No	No
189	Male	53	21.1	No	Yes	Primary	Urban	No	No	No	No	No	No	No	No	No	No	No	No	No	No	No	No	No	No	No	No	No	No	No	No	No
190	Male	36	21.6	No	Yes	Secondary	Urban	No	No	No	No	No	No	No	No	No	No	No	No	No	No	No	No	No	No	No	No	No	No	No	No	No
191	Male	42	21.5	No	Yes	Primary	Rural	No	No	No	No	No	No	No	No	No	No	No	No	No	No	No	No	No	No	No	No	No	No	No	No	No
192	Male	24	22.1	No	No		Urban	No	No	Yes	No	No	No	No	No	No	No	No	No	No	No	No	No	No	No	No	No	No	No	No	No	No
193	Male	41	23.5	No	Yes	Secondary	Urban	No	No	No	No	No	No	No	No	No	No	No	No	No	No	No	No	No	No	No	No	No	No	No	No	No
194	Male	38	20.8	No	Yes	University	Urban	No	No	No	No	No	No	No	No	No	No	No	No	No	No	No	No	No	No	No	No	No	No	No	No	No
195	Male	31	19.9	No	Yes	Primary	Urban	No	Yes	No	No	No	No	No	No	No	No	No	No	No	No	No	No	No	No	No	No	No	No	No	No	No
196	Male	42	21.3	No	Yes	Secondary	Urban	No	No	No	No	No	No	No	No	No	No	No	No	No	No	No	No	No	No	No	No	No	No	No	No	No
197	Male	61	22.1	No	Yes	University	Urban	No	No	No	No	No	No	No	No	No	No	No	No	No	No	No	No	No	No	No	No	No	No	No	No	No
198	Male	46	20.3	No	Yes	Secondary	Rural	No	No	No	No	No	No	No	No	No	No	No	No	No	No	No	No	No	No	No	No	No	No	No	No	No
199	Male	30	24.3	Yes	Yes	University	Urban	No	No	No	No	No	No	No	No	No	No	No	No	No	No	No	No	No	No	No	No	No	No	No	No	No
200	Male	31	22.1	No	No		Urban	No	No	No	No	No	No	No	No	No	No	No	No	No	No	No	No	No	No	No	No	No	No	No	No	No
201	Male	44	24.4	No	Yes	Secondary	Urban	No	No	No	No	No	No	No	No	No	No	No	No	No	No	No	No	No	No	No	No	No	No	No	No	No
202	Male	42	21.2	No	Yes	University	Urban	No	No	No	No	No	No	No	No	No	No	No	No	No	No	No	No	No	No	No	No	No	No	No	No	No
203	Male	40	19.7	No	No	Primary	Urban	No	No	No	No	No	No	No	No	No	No	No	No	No	No	No	No	No	No	No	No	No	No	No	No	No
204	Male	39	21.9	No	Yes	Secondary	Rural	No	No	No	No	No	No	No	No	No	No	No	No	No	No	No	No	No	No	No	No	No	No	No	No	No
205	Male	56	23.1	No	Yes	University	Urban	No	No	No	No	No	No	No	No	No	No	No	No	No	No	No	No	No	No	No	No	No	No	No	No	No
206	Male	54	21.3	No	Yes	Secondary	Urban	No	No	No	No	No	No	No	No	No	No	No	No	No	No	No	No	No	No	No	No	No	No	No	No	No
207	Male	31	22.2	No	No	Primary	Urban	No	No	No	No	No	No	No	No	No	No	No	No	No	No	No	No	No	No	No	No	No	No	No	No	No
208	Male	40	24.2	No	Yes	University	Urban	No	No	No	No	No	No	No	No	No	No	No	No	No	No	No	No	No	No	No	No	No	No	No	No	No
209	Male	61	23.3	No	Yes		Rural	No	Yes	No	No	No	No	No	No	No	No	No	No	No	No	No	No	No	No	No	No	No	No	No	No	No
210	Male	34	20.8	No	No	Primary	Urban	No	No	No	No	No	No	No	No	No	No	No	No	No	No	No	No	No	No	No	No	No	No	No	No	No
211	Male	38	20.5	Yes	Yes	Secondary	Urban	No	No	No	No	No	No	No	No	No	No	No	No	No	No	No	No	No	No	No	No	No	No	No	No	No
212	Male	52	24.1	No	Yes	Primary	Urban	No	No	No	No	No	No	No	No	No	No	No	No	No	No	No	No	No	No	No	No	No	No	No	No	No
213	Male	24	18.9	No	Yes	Secondary	Urban	No	No	No	No	No	No	No	No	No	No	No	No	No	No	No	No	No	No	No	No	No	No	No	No	No
214	Male	38	21.2	No	Yes	Primary	Urban	No	Yes	No	No	No	No	No	No	No	No	No	No	No	No	Yes	No	No	No	No	No	No	No	No	No	No
215	Male	37	23.1	No	Yes	University	Urban	No	No	No	No	No	No	No	No	No	No	No	No	No	No	No	No	No	No	No	No	No	No	No	No	No
216	Male	46	20.8	No	Yes	Primary	Rural	No	No	No	No	No	No	No	No	No	No	No	No	No	No	No	No	No	No	No	No	Yes	No	No	No	No
217	Male	28	22.2	No	Yes	Secondary	Urban	No	No	No	No	No	No	No	No	No	No	No	No	No	No	No	No	No	No	No	No	No	No	No	No	No
218	Male	44	22.3	No	No	Secondary	Urban	No	No	No	No	No	No	No	No	No	No	No	No	No	No	No	No	No	No	No	No	No	No	No	No	No
219	Female	55	24.1	Yes	Yes	University	Urban	No	No	No	No	No	No	No	No	No	No	No	No	No	No	No	No	No	No	No	No	No	No	No	No	No
220	Female	36	20.3	No	Yes	Secondary	Urban	No	No	No	No	No	No	No	No	No	No	No	No	No	No	No	No	No	No	No	No	No	No	No	No	No
221	Female	32	22.1	No	Yes	University	Urban	No	No	No	No	No	No	No	No	No	No	No	No	No	No	No	No	No	No	No	No	No	No	Yes	No	No
222	Female	46	23.1	No	Yes		Urban	No	No	No	No	No	No	No	No	No	No	No	No	No	No	No	No	No	No	No	No	No	No	No	No	No
223	Female	48	23.9	No	No	No studies	Rural	No	No	No	No	No	No	No	No	No	No	No	No	No	No	No	No	No	No	No	No	No	No	No	No	No
224	Female	37	23.8	No	No		Urban	No	No	No	No	Yes	No	No	No	No	No	No	No	No	No	No	No	No	No	No	No	Yes	No	No	No	No
225	Female	16	19.4	No	No	Primary	Urban	No	No	No	No	No	No	No	No	No	No	No	No	No	No	No	No	No	No	No	No	No	No	No	No	No
226	Female	34	23.1	No	No	Primary	Urban	No	No	No	No	Yes	No	No	No	No	No	No	No	No	No	No	No	No	No	No	No	No	No	No	No	No
227	Female	57	22.9	No	Yes	No studies	Urban	No	No	No	No	No	No	No	No	No	No	No	No	No	No	No	No	No	No	No	No	No	No	No	No	No
228	Female	35	24.1	Yes	Yes	University	Urban	Yes	No	No	No	No	No	No	No	No	No	No	No	No	No	No	No	No	No	No	Yes	No	No	No	No	No
229	Female	37	21.9	No	No	Secondary	Urban	No	No	No	No	No	No	No	No	No	No	No	No	No	No	No	No	No	No	No	No	No	No	No	No	No
230	Female	45	23.1	No	Yes	University	Urban	No	No	No	No	No	No	No	No	No	No	No	No	No	No	No	No	No	No	No	No	No	No	No	No	No
231	Female	18	19.84	No	No	Secondary	Urban	No	No	No	No	No	No	No	No	No	No	No	No	No	No	No	No	No	No	No	No	No	No	No	No	No
232	Female	35	23.8	No	No		Urban	No	No	No	No	No	No	No	No	No	No	No	No	No	No	No	No	No	No	No	No	No	No	No	No	No
233	Female	39	23.6	No	Yes		Urban	No	Yes	No	No	No	No	No	No	No	No	No	No	No	No	No	No	No	No	No	No	No	No	No	No	No
234	Female	32	24.5	No	No	Primary	Urban	Yes	No	No	No	No	No	No	No	No	No	No	No	No	No	Yes	No	No	No	No	No	No	No	No	No	No
235	Female	39	21.1	No	No		Urban	No	No	No	No	No	No	No	No	No	No	No	No	No	No	No	No	No	No	No	No	No	No	No	No	No
236	Female	52	23.8	No	No	No studies	Urban	No	No	No	No	Yes	No	No	No	No	No	No	No	No	No	No	No	No	No	No	No	No	No	No	No	No
237	Female	17	22.7	No	No	Primary	Urban	No	No	No	No	No	No	No	No	No	No	No	No	No	No	No	No	No	No	No	No	No	No	No	No	No
238	Female	46	22.8	No	Yes	University	Urban	No	No	No	No	No	No	No	No	No	No	No	No	No	No	No	No	No	No	No	No	No	No	No	No	No
239	Female	39	21.6	No	Yes	Primary	Urban	No	No	No	No	No	No	No	No	No	No	No	No	No	No	No	No	No	No	No	No	No	No	No	No	No
240	Female	42	22.88	No	Yes	Secondary	Urban	No	Yes	No	No	No	No	No	No	No	No	No	No	No	No	No	No	No	No	No	No	No	No	No	No	No
241	Female	46	23.5	No	No	Primary	Urban	No	No	No	No	No	No	No	No	No	No	No	No	No	No	Yes	No	No	No	No	No	No	No	No	No	No
242	Female	48	22.7	No	Yes	University	Urban	No	No	No	No	No	No	No	No	No	No	No	No	No	No	No	No	No	No	No	No	No	No	No	No	No
243	Female	62	23.2	No	No		Urban	No	No	No	No	No	No	No	No	Yes	No	No	No	No	No	No	No	No	No	No	No	No	No	No	No	No
244	Female	46	19.5	No	Yes	Secondary	Urban	No	No	No	No	No	No	No	No	No	No	No	No	No	No	No	No	No	No	No	No	No	No	No	No	No
245	Female	40	22.2	No	Yes	University	Urban	No	Yes	No	No	No	No	No	No	No	No	No	No	No	No	No	No	No	No	No	No	No	No	No	No	No
246	Female	39	23.5	No	No	Primary	Urban	No	No	No	No	Yes	No	No	No	No	No	No	No	No	No	No	No	No	No	No	No	No	No	No	No	No
247	Female	25	23.8	No	No	Secondary	Urban	No	No	No	No	No	No	No	No	No	No	No	No	No	No	No	No	No	No	No	No	No	No	No	No	No
248	Female	52	24.7	Yes	Yes	Secondary	Urban	Yes	Yes	No	No	No	No	No	No	No	No	No	No	No	No	Yes	No	No	No	No	No	No	No	No	No	No
249	Female	39	22.8	No	No	Primary	Urban	No	No	No	No	No	No	No	No	No	No	No	No	No	No	No	No	No	No	No	No	No	No	No	No	No
250	Female	25	23.5	No	Yes	Secondary	Urban	No	No	No	No	No	No	No	No	No	No	No	No	No	No	No	No	No	No	No	No	No	No	No	No	No
251	Female	60	22.1	No	No		Rural	No	No	No	No	No	No	No	No	No	No	No	No	No	No	No	No	No	No	No	No	No	No	No	No	No
252	Female	17	21.9	No	No	Primary	Urban	No	No	No	No	No	No	No	No	No	No	No	No	No	No	No	No	No	No	No	No	No	No	Yes	No	No
253	Female	36	22.9	No	No	Secondary	Urban	No	No	No	No	Yes	No	No	No	No	No	No	No	No	No	No	No	No	No	No	No	No	No	No	No	No
254	Female	47	24.1	No	Yes	Primary	Urban	No	No	No	No	No	No	No	No	No	No	No	No	No	No	No	No	No	No	No	No	No	No	No	No	No
255	Female	21	24.4	No	No		Urban	No	No	No	No	No	No	No	No	No	No	No	No	No	No	No	No	No	No	No	Yes	No	No	No	No	No
256	Female	36	21.3	No	Yes	Primary	Urban	No	No	No	No	No	No	No	No	No	No	No	No	No	No	No	No	No	No	No	No	No	No	No	No	No
257	Female	61	22.7	No	No		Urban	No	No	No	No	Yes	No	No	No	No	No	No	No	No	No	No	No	No	No	No	No	No	No	No	No	No
258	Female	36	24.1	No	Yes	University	Urban	No	No	No	No	No	No	No	No	No	No	No	No	No	No	No	No	No	No	No	No	No	No	No	No	No
259	Female	29	23.3	No	No	Primary	Urban	No	No	No	No	No	No	No	No	No	No	No	No	No	No	No	No	No	No	No	No	No	No	No	Yes	No
260	Female	28	23.7	Yes	Yes	Primary	Urban	No	No	No	No	No	No	No	No	No	No	No	No	No	No	No	No	No	No	No	No	No	No	No	No	No
261	Female	45	20.4	No	Yes	University	Urban	No	No	No	No	No	No	No	No	No	No	No	No	No	No	No	No	No	No	No	No	No	No	No	No	No
262	Female	43	24.7	No	No	Primary	Urban	No	No	No	No	No	No	No	No	No	No	No	No	No	No	No	No	No	No	No	No	No	No	No	No	No
263	Female	19	18.31	No	No	Secondary	Urban	No	Yes	No	No	No	No	No	No	No	No	No	No	No	No	No	No	No	No	No	No	No	No	No	No	No
264	Female	20	17.53	No	No	Secondary	Urban	No	No	No	No	No	No	No	No	No	Yes	No	No	No	No	Yes	No	No	No	No	No	No	No	Yes	No	No
265	Female	16	18.48	No	No	Secondary	Urban	No	No	No	No	No	No	No	No	No	No	No	No	No	No	Yes	No	No	No	No	No	Yes	Yes	No	No	No
266	Female	17	18.3	No	No	Secondary	Urban	Yes	No	No	No	No	No	No	No	No	No	No	Yes	No	No	No	No	No	No	No	No	No	No	No	No	No
267	Female	31	18.2	Yes	Yes	Primary	Urban	No	No	No	No	No	No	No	No	No	No	No	No	No	No	No	No	No	No	No	No	No	No	No	No	No
268	Female	18	18.11	No	No	Primary	Urban	Yes	Yes	No	No	No	No	No	No	No	No	No	No	No	No	No	No	No	No	No	No	No	No	No	No	No
269	Female	51	17.71	Yes	Yes	Secondary	Rural	No	No	No	No	No	No	No	No	No	No	No	No	No	No	No	No	No	No	No	No	No	No	No	No	No
270	Female	22	17.62	No	No	Secondary	Urban	No	No	No	No	No	No	No	No	No	No	No	No	No	No	No	No	No	No	No	No	No	No	No	No	No
271	Female	16	17.53	No	No	Primary	Urban	No	Yes	No	No	No	No	No	No	No	Yes	No	No	No	Yes	Yes	No	No	No	No	No	No	No	Yes	No	No
272	Female	21	17.82	No	No	Primary	Urban	No	No	No	No	No	No	No	No	No	No	No	No	No	No	No	No	No	No	No	No	No	No	No	No	No
273	Female	30	17.4	Yes	Yes	Secondary	Urban	No	No	No	No	No	No	No	No	No	No	No	No	No	No	No	No	No	No	No	No	No	No	No	No	No
274	Female	17	18.13	No	No	Primary	Urban	No	No	No	No	No	No	No	No	No	No	No	No	No	No	No	No	No	No	No	No	No	No	No	No	No
275	Female	20	17.32	No	No	Primary	Urban	Yes	No	No	No	No	No	No	No	No	No	No	No	No	No	No	No	No	No	No	No	No	No	No	No	No
276	Female	25	18.33	No	No	University	Urban	No	No	No	No	No	No	No	No	No	No	Yes	No	No	No	Yes	No	No	No	No	No	No	No	Yes	No	No
277	Female	18	17.96	No	No	Primary	Urban	No	No	No	No	No	No	No	No	No	No	No	No	No	No	No	No	No	No	No	No	No	No	No	No	No
278	Female	42	18.45	Yes	Yes	Secondary	Urban	No	No	No	No	No	No	No	No	No	Yes	No	No	No	No	No	No	No	No	No	No	No	No	No	No	No
279	Female	16	17.61	No	No	Primary	Urban	No	No	No	No	No	No	No	No	No	No	No	No	No	No	No	No	No	No	No	No	No	No	No	No	No
280	Female	27	18.12	No	No	University	Rural	No	No	No	No	No	Yes	No	No	No	No	No	No	No	No	No	No	No	No	No	No	No	No	No	No	No
281	Female	30	17.53	No	Yes	Secondary	Urban	Yes	No	No	No	No	No	No	No	No	No	No	No	No	No	No	No	No	No	No	No	No	No	No	No	No
282	Female	16	18.44	No	No	Primary	Urban	No	Yes	No	No	No	No	No	No	No	No	No	No	No	No	No	No	No	No	No	No	No	No	No	No	No
283	Female	21	17.89	No	No	Secondary	Urban	No	No	No	No	No	No	No	No	No	No	No	No	No	No	No	No	No	No	No	No	No	No	No	No	No
284	Female	24	17.63	No	No	Primary	Urban	No	Yes	No	No	No	No	No	No	No	No	Yes	No	No	Yes	Yes	No	No	No	No	No	No	No	Yes	No	No
285	Female	16	17.51	No	No	Primary	Urban	No	No	No	No	No	No	No	No	No	No	No	No	No	No	No	No	No	No	No	No	No	No	No	No	No
286	Female	22	18.32	No	No	Secondary	Urban	No	No	No	No	No	No	No	No	No	No	No	No	No	No	No	No	No	No	No	No	No	No	No	No	No
287	Female	17	17.66	No	No	Primary	Urban	No	No	No	No	No	No	No	No	No	No	No	No	No	No	No	No	No	No	No	No	No	No	No	No	No
288	Female	28	18.44	No	Yes	Primary	Urban	Yes	Yes	No	No	No	No	No	No	No	No	No	No	No	No	No	No	No	No	No	No	No	No	No	No	No
289	Female	16	17.56	No	No	Primary	Urban	No	No	No	No	No	No	No	No	No	No	No	No	No	No	No	No	No	No	No	No	No	No	No	No	No
290	Female	27	18.43	No	No	Secondary	Urban	No	No	No	No	No	No	No	No	No	Yes	No	No	No	Yes	Yes	No	No	No	No	No	Yes	Yes	No	No	No
291	Female	18	18.32	No	No	Primary	Urban	No	Yes	No	No	No	No	No	No	No	No	No	No	No	No	No	No	No	No	No	No	No	No	No	No	No
292	Female	38	18.45	Yes	Yes	Secondary	Urban	No	No	No	No	No	No	No	No	No	No	No	No	No	No	No	No	No	No	No	No	No	No	No	No	No
293	Female	16	17.46	No	No	Primary	Urban	Yes	No	No	No	No	No	No	No	No	Yes	No	No	No	Yes	Yes	No	No	No	No	No	No	No	Yes	No	No
294	Female	29	18.43	Yes	Yes	University	Urban	No	No	No	No	No	No	No	No	No	No	No	No	No	No	No	No	No	No	No	No	No	No	No	No	No
295	Female	19	17.83	No	No	Secondary	Urban	No	No	No	No	No	No	No	No	No	No	No	No	No	No	No	No	No	No	No	No	No	No	No	No	No
296	Female	21	18.12	No	No	Secondary	Urban	No	No	No	No	No	No	No	No	No	No	No	No	No	No	No	No	No	No	No	No	No	No	No	No	No
297	Female	20	18.23	No	No	Primary	Urban	No	No	No	No	No	No	No	No	No	No	No	No	No	No	No	No	No	No	No	No	No	No	No	No	No
298	Female	46	18.42	No	No	Primary	Rural	No	No	No	No	No	No	No	No	No	No	No	No	No	No	No	No	No	No	No	No	No	No	No	No	No
299	Female	22	18.15	No	No	Secondary	Urban	No	No	No	No	No	No	No	No	No	No	No	No	No	No	No	No	No	No	No	No	No	No	No	No	No
300	Female	17	17.96	No	No	Primary	Urban	No	No	No	No	No	No	No	No	No	No	Yes	No	No	Yes	Yes	No	No	No	No	No	No	No	Yes	No	No
301	Female	19	17.83	No	No	Secondary	Urban	No	Yes	No	No	No	No	No	No	No	No	No	No	No	No	No	No	No	No	No	No	No	No	No	No	No
302	Female	50	18.42	Yes	Yes	Primary	Urban	Yes	No	No	No	No	No	No	No	Yes	No	No	No	No	No	No	No	No	No	No	No	No	No	No	No	No
303	Female	18	17.91	No	No	Primary	Urban	No	No	No	No	No	No	No	No	No	No	No	No	No	No	No	No	No	No	No	No	No	No	No	No	No
304	Male	16	18.46	No	No	Primary	Urban	No	No	No	No	No	No	No	No	No	No	No	No	No	No	No	No	No	No	No	No	No	No	Yes	No	No
305	Male	17	17.52	No	No	Primary	Urban	Yes	No	No	No	No	No	No	No	No	No	No	No	No	Yes	No	No	No	No	No	No	No	No	No	No	No
306	Male	19	17.49	No	No	Secondary	Urban	No	No	No	No	No	No	No	No	No	Yes	No	No	No	No	Yes	No	No	No	No	No	No	Yes	No	No	No
307	Male	19	18.37	No	No	Secondary	Urban	No	Yes	No	No	No	No	No	No	No	No	No	No	No	No	No	No	No	No	No	No	No	No	No	No	No
308	Male	20	18.21	No	No	Secondary	Urban	No	No	No	No	No	No	No	No	No	No	No	No	No	No	No	No	No	No	No	No	No	No	No	No	No
309	Male	17	17.56	No	No	Secondary	Urban	No	No	No	No	No	No	No	No	No	No	Yes	No	No	No	No	No	No	No	No	No	No	No	Yes	No	No
310	Male	18	18.32	No	No	Secondary	Urban	No	No	No	No	No	No	No	No	No	No	No	No	No	Yes	No	No	No	No	No	No	No	No	No	No	No
311	Male	18	18.21	No	No	Secondary	Urban	No	No	No	No	No	No	No	No	No	No	No	No	No	No	No	No	No	No	No	No	No	No	No	No	No
312	Male	18	18.44	No	No	Primary	Urban	Yes	No	No	No	No	No	No	No	No	No	Yes	No	No	No	Yes	No	No	No	No	No	Yes	No	Yes	No	No
313	Male	17	18.43	No	No	Primary	Urban	No	Yes	No	No	No	No	No	No	No	No	No	No	No	No	No	No	No	No	No	No	No	No	No	No	No
314	Male	16	17.81	No	No	Secondary	Urban	No	No	No	No	No	No	No	No	No	No	No	No	No	No	No	No	No	No	No	No	No	No	No	No	No
315	Male	20	17.92	No	No	Secondary	Urban	No	No	No	No	No	No	No	No	No	No	No	No	No	No	No	No	No	No	No	No	No	No	No	No	No
316	Male	19	18.31	No	No	Primary	Urban	No	No	No	No	No	No	No	No	No	No	No	No	No	No	No	No	No	No	No	No	No	No	No	No	No
317	Male	18	18.12	No	No	Primary	Urban	No	No	No	No	No	No	No	No	No	Yes	No	No	No	Yes	No	No	No	No	No	No	No	No	No	No	No
318	Male	17	17.62	No	No	Primary	Urban	No	No	No	No	No	No	No	No	No	No	No	No	No	No	No	No	No	No	No	No	No	No	No	No	No
319	Male	16	17.83	No	No	Secondary	Urban	No	Yes	No	No	No	No	No	No	Yes	No	No	No	No	No	Yes	No	No	No	No	No	No	No	Yes	No	No
320	Male	17	18.44	No	No	Primary	Rural	No	No	No	No	No	No	No	No	No	No	No	No	No	No	No	No	No	No	No	Yes	No	No	No	No	No
321	Male	17	17.51	No	No	Primary	Urban	Yes	No	No	No	No	No	No	No	No	No	No	No	No	No	No	No	No	No	No	No	No	No	No	No	No
322	Male	20	17.92	No	No	Secondary	Urban	Yes	No	No	No	No	No	No	No	No	No	No	No	No	No	No	No	No	No	No	No	No	No	Yes	No	No
323	Male	22	18.31	No	No	Secondary	Urban	No	No	No	No	No	No	No	No	No	No	No	No	No	No	No	No	No	No	No	No	No	No	No	No	No
324	Male	21	17.81	No	No	Primary	Urban	No	No	No	No	No	No	No	No	No	No	No	No	No	No	No	No	No	No	No	No	No	No	No	No	No
325	Male	23	17.93	No	No	Secondary	Urban	No	No	No	No	No	No	No	No	No	No	No	No	No	No	No	No	No	No	No	No	No	No	No	No	No
326	Male	26	18.32	No	No	University	Urban	No	No	No	No	No	No	No	No	No	No	No	No	No	No	No	No	No	No	No	No	No	No	No	No	No
327	Male	29	18.41	Yes	Yes	Secondary	Urban	No	Yes	No	No	No	No	No	No	No	No	No	No	No	No	No	No	No	No	No	No	No	No	No	No	No
328	Male	27	17.93	No	No	University	Urban	No	No	No	No	No	No	No	No	No	No	No	No	No	No	No	No	No	No	No	No	No	No	No	No	No
329	Male	23	18.12	No	No	Secondary	Urban	No	No	No	No	No	No	No	No	No	No	No	No	No	No	No	No	No	No	No	No	No	No	No	No	No
330	Male	21	17.51	No	No	Primary	Urban	No	No	No	No	No	No	No	No	No	No	No	No	No	No	No	No	No	No	No	No	No	No	No	No	No
331	Male	25	17.67	No	No	Primary	Urban	Yes	No	No	No	No	No	No	No	No	No	No	No	No	No	No	No	No	No	No	No	No	No	No	No	No
332	Male	26	17.82	Yes	Yes	Secondary	Urban	No	No	No	No	No	No	No	No	No	No	No	No	No	No	No	No	No	No	No	No	No	No	No	No	No
333	Male	27	18.42	Yes	Yes	Secondary	Urban	No	No	No	No	No	No	No	No	No	No	No	No	No	No	No	No	No	No	No	Yes	No	No	No	No	No
334	Male	28	18.13	No	No	Primary	Urban	No	No	No	No	No	No	No	No	No	No	No	No	No	No	No	No	No	No	No	No	No	No	No	No	No
335	Male	29	18.24	Yes	Yes	Primary	Urban	No	No	No	No	No	No	No	No	No	No	No	No	No	No	No	No	No	No	No	No	No	No	No	No	No
336	Male	54	18.31	No	No	University	Rural	No	Yes	No	No	No	No	No	No	No	Yes	No	No	No	No	No	No	No	No	No	No	No	No	No	No	No
337	Male	51	18.47	No	No	University	Urban	No	No	No	No	No	No	No	No	No	No	No	No	No	No	No	No	No	No	No	No	No	No	No	No	No
338	Male	33	18.31	No	No	Secondary	Urban	No	No	No	No	No	No	No	No	No	No	No	No	No	No	No	No	No	No	No	No	No	No	No	No	No
339	Male	38	18.41	No	No	Secondary	Urban	No	No	No	No	No	No	No	No	No	No	No	No	No	No	No	No	No	No	No	No	No	No	No	No	No
340	Male	48	18.48	No	No	Secondary	Rural	No	No	No	No	No	No	No	No	No	No	No	No	No	No	No	No	No	No	No	No	No	No	No	No	No
341	Male	60	28.3	Yes	Yes	University	Rural	No	No	No	No	No	No	No	No	No	No	No	No	No	No	No	No	No	No	No	Yes	No	No	No	No	No
342	Male	51	29	No	No	Secondary	Rural	Yes	Yes	No	No	No	No	No	No	No	No	No	No	No	No	No	No	No	No	No	No	Yes	No	No	No	No
343	Male	43	27.1	No	No	Primary	Urban	No	No	No	No	No	No	No	No	No	No	No	No	No	No	No	No	No	No	No	No	No	No	No	No	No
344	Male	25	26.7	No	Yes	Secondary	Urban	No	No	No	No	No	No	No	No	No	No	No	No	No	No	No	No	No	No	No	No	No	No	No	No	Yes
345	Male	32	25.1	No	No	Secondary	Urban	No	No	No	No	No	No	No	No	No	No	No	No	No	Yes	No	No	No	No	No	No	No	No	No	No	No
346	Male	41	28.5	Yes	Yes	Primary	Urban	No	Yes	Yes	No	No	No	No	No	No	No	No	No	No	No	No	No	No	No	No	No	No	No	No	No	No
347	Male	38	26.3	No	Yes	Secondary	Urban	No	No	No	No	No	No	No	No	No	No	No	Yes	No	No	No	No	No	No	No	No	No	No	No	No	No
348	Male	30	27.7	No	Yes	University	Urban	No	No	No	No	No	No	No	No	No	No	No	No	No	No	No	No	No	No	No	Yes	No	No	No	No	No
349	Male	27	25.3	Yes	Yes	No studies	Urban	Yes	No	No	No	No	No	No	No	No	No	No	No	No	No	No	No	No	No	No	No	No	No	No	No	No
350	Male	45	28.5	No	No	Secondary	Urban	No	No	No	No	No	No	No	No	No	No	No	No	No	No	No	No	No	No	No	No	No	No	No	No	No
351	Male	53	27.1	No	Yes	Secondary	Urban	No	Yes	No	No	No	No	No	No	No	No	No	Yes	No	No	No	No	No	No	No	No	No	No	No	No	No
352	Male	51	28.3	No	Yes	Secondary	Rural	No	No	No	No	No	No	No	No	No	No	No	No	No	No	No	No	No	No	No	No	Yes	No	No	No	No
353	Male	28	25.1	No	No	Primary	Urban	No	No	No	No	No	No	No	No	No	No	No	No	No	No	Yes	No	No	No	No	No	No	No	No	No	No
354	Male	33	26.2	No	Yes	No studies	Urban	Yes	No	No	No	No	No	No	No	No	No	No	No	No	No	No	No	No	No	No	No	No	No	No	No	No
355	Male	43	29.8	No	Yes	University	Urban	No	No	No	Yes	No	No	No	No	No	No	No	No	No	No	No	No	No	No	No	No	No	No	No	No	No
356	Male	52	27.3	No	No	Secondary	Urban	No	No	No	No	No	No	No	No	No	No	No	No	No	No	No	No	No	No	No	Yes	No	No	No	No	No
357	Male	29	25.3	Yes	Yes	Secondary	Urban	No	No	No	No	No	No	No	No	No	No	No	No	No	No	No	No	No	No	No	No	No	No	No	No	No
358	Male	33	27.9	No	Yes	Primary	Urban	No	No	No	No	No	No	No	No	No	No	No	No	No	No	No	No	No	No	No	No	No	No	No	No	Yes
359	Male	45	26.2	No	No	No studies	Urban	No	No	No	No	No	No	No	No	No	No	No	No	No	No	No	No	No	No	No	No	No	No	No	No	No
360	Male	47	25.8	No	Yes	Secondary	Urban	No	No	No	No	No	No	No	No	No	No	No	No	No	No	No	No	No	No	No	No	No	No	No	No	No
361	Male	27	27.1	No	Yes	Secondary	Urban	Yes	Yes	No	No	No	No	No	No	No	No	No	No	No	No	No	No	No	No	No	No	No	No	No	No	No
362	Male	31	28.1	No	Yes	University	Urban	No	No	No	No	No	No	No	No	No	No	No	No	No	No	No	No	No	No	No	No	No	No	No	No	No
363	Male	25	28.3	No	Yes	Secondary	Urban	No	No	No	No	No	No	No	No	No	No	No	No	No	Yes	No	No	No	No	No	No	No	No	No	No	No
364	Male	19	27	No	Yes	No studies	Urban	No	No	No	No	No	No	No	No	No	No	No	No	No	No	No	No	No	No	No	No	No	No	No	No	No
365	Male	31	27.1	No	Yes	University	Urban	No	No	No	No	No	No	No	No	No	No	No	No	No	No	No	No	No	No	No	No	No	No	No	No	No
366	Male	42	28.6	No	No	No studies	Urban	No	No	Yes	No	No	No	No	No	No	No	No	No	No	No	No	No	No	No	No	No	No	No	No	No	No
367	Male	27	27.8	No	Yes	Secondary	Urban	No	No	No	No	No	No	No	No	No	No	No	No	No	Yes	No	No	No	No	No	Yes	No	No	No	No	No
368	Male	25	28.5	No	Yes	Secondary	Urban	No	No	No	No	No	No	No	No	No	No	No	Yes	No	No	No	No	No	No	No	No	No	No	No	No	No
369	Male	34	26.7	No	No	Primary	Urban	Yes	Yes	No	No	No	No	No	No	No	No	No	No	No	No	No	No	No	No	No	No	No	No	No	No	Yes
370	Male	39	28.9	Yes	Yes	Secondary	Urban	No	No	No	No	No	No	No	No	No	No	No	No	No	No	No	No	No	No	No	No	No	No	No	No	No
371	Male	47	26.3	No	Yes	No studies	Urban	Yes	No	No	No	No	No	No	No	No	No	No	No	No	No	No	No	No	No	No	No	No	No	No	No	No
372	Male	51	27.6	No	No	University	Urban	No	No	No	No	No	No	No	No	No	No	No	No	No	Yes	No	No	No	No	No	No	No	No	No	No	No
373	Male	18	29.1	No	Yes	Primary	Urban	No	Yes	No	No	No	No	No	No	No	No	No	No	No	No	No	No	No	No	No	No	No	No	No	No	No
374	Male	53	29	No	Yes	Primary	Rural	No	No	No	No	No	No	No	No	No	No	No	No	No	No	No	No	No	No	No	No	Yes	No	No	No	No
375	Male	19	28.5	No	No	Secondary	Urban	No	No	No	No	No	No	No	No	No	No	No	No	No	Yes	No	No	No	No	No	No	No	No	No	No	No
376	Male	20	25.2	No	Yes	Secondary	Urban	No	No	No	Yes	No	No	No	No	No	No	No	No	No	No	No	No	No	No	No	No	No	No	No	No	No
377	Male	29	26.1	No	Yes	Secondary	Urban	No	Yes	No	No	No	No	No	No	No	No	No	No	No	No	No	No	No	No	No	No	No	No	No	No	No
378	Male	36	28.7	No	No	Primary	Urban	No	Yes	No	No	No	No	No	No	No	No	No	No	No	No	No	No	No	No	No	No	No	No	No	No	No
379	Male	57	26.9	No	Yes	No studies	Rural	No	No	No	No	No	No	No	No	No	No	No	Yes	No	No	No	No	No	No	No	No	No	No	No	No	No
380	Male	61	26.8	No	No	Primary	Urban	No	No	No	No	No	No	No	No	No	No	No	No	No	No	No	No	No	No	No	No	No	No	No	No	No
381	Male	52	26	No	Yes	No studies	Rural	Yes	No	No	No	No	No	No	No	No	No	No	No	No	No	No	No	No	No	No	No	No	No	No	No	No
382	Male	26	25.3	No	Yes	Primary	Urban	No	No	No	No	No	No	No	No	No	No	No	No	No	No	No	No	No	No	No	No	No	No	No	No	No
383	Male	31	28	No	No	Secondary	Urban	No	No	No	No	No	No	No	No	No	No	No	No	No	No	Yes	No	No	No	No	No	No	No	No	No	No
384	Male	44	27.6	No	Yes	Secondary	Urban	No	Yes	No	No	No	No	No	No	No	No	No	No	No	No	No	No	No	No	No	No	No	No	No	No	Yes
385	Male	41	26.6	No	No	Primary	Urban	Yes	No	No	No	No	No	No	No	No	No	No	No	No	No	No	No	No	No	No	No	No	No	No	No	No
386	Female	25	28.6	No	Yes	Secondary	Urban	No	No	No	No	No	No	No	No	No	No	No	No	No	Yes	No	No	No	No	No	No	No	No	No	No	No
387	Female	42	29.3	No	No	Secondary	Urban	Yes	No	No	No	Yes	No	No	No	No	No	No	No	No	No	No	No	No	No	No	No	No	No	No	No	No
388	Female	30	28.7	Yes	Yes	University	Urban	No	Yes	No	No	No	No	No	No	No	No	No	No	No	No	No	No	No	No	No	No	Yes	No	No	No	No
389	Female	26	27.2	No	Yes	No studies	Rural	No	No	No	No	No	No	No	No	No	No	No	No	No	No	No	No	No	No	No	No	No	No	No	No	No
390	Female	38	29.2	No	No	Secondary	Urban	No	No	No	No	No	No	No	No	No	No	No	No	No	Yes	No	No	No	No	No	No	No	No	No	No	No
391	Female	42	26.1	No	No	Secondary	Urban	No	No	No	No	No	No	No	No	No	No	No	No	No	No	No	No	No	No	No	No	No	No	No	No	Yes
392	Female	41	28.9	No	Yes	Primary	Urban	No	No	No	No	No	No	No	No	No	No	No	No	No	No	No	No	No	No	No	No	No	No	No	No	No
393	Female	52	29.1	No	No	No studies	Urban	No	No	No	No	No	No	No	No	No	No	No	No	No	No	No	No	No	No	No	No	No	No	No	No	No
394	Female	46	25.7	No	Yes	University	Urban	Yes	No	No	No	No	No	No	No	No	No	No	No	No	No	Yes	No	No	No	No	No	No	No	No	No	No
395	Female	39	29.2	No	Yes	University	Urban	No	Yes	No	No	No	No	No	No	No	No	No	No	No	No	No	No	No	No	No	No	No	No	No	No	No
396	Female	18	28.6	No	Yes	Primary	Urban	No	No	No	No	No	No	No	No	No	Yes	No	No	No	No	No	No	No	No	No	No	No	No	No	No	No
397	Female	37	25.3	No	No	Secondary	Urban	No	No	No	No	No	No	No	No	No	No	No	No	No	No	No	No	No	No	No	No	No	No	No	No	No
398	Female	30	26.7	Yes	No	Primary	Rural	No	No	No	No	No	No	No	No	No	No	No	No	No	No	No	No	No	No	No	No	No	No	No	No	No
399	Female	29	28.8	No	Yes	University	Urban	No	No	No	No	No	No	No	No	No	No	No	Yes	No	No	No	No	No	No	No	No	No	No	No	No	No
400	Female	18	29.4	No	No	No studies	Urban	No	No	No	No	No	No	No	No	No	No	No	No	No	No	No	No	No	No	No	No	No	No	No	No	Yes
401	Female	42	27.2	No	No	University	Urban	No	No	No	No	No	No	No	No	No	No	No	No	No	No	No	No	No	No	No	No	No	No	No	No	No
402	Female	45	25.3	No	Yes	Secondary	Urban	No	No	No	No	No	No	No	No	No	No	No	No	No	No	No	No	No	No	No	No	No	No	No	No	No
403	Female	33	26.9	No	No	Primary	Urban	No	No	No	No	No	No	No	No	No	No	No	No	No	No	No	No	No	No	No	No	Yes	No	No	No	No
404	Female	54	28.3	No	No	Primary	Rural	No	No	No	No	No	No	No	No	No	No	No	No	No	No	No	No	No	No	No	No	No	No	No	No	No
405	Female	56	29.5	No	Yes	Secondary	Urban	No	No	No	No	No	No	No	No	No	No	No	Yes	No	No	No	No	No	No	No	No	No	No	No	No	No
406	Female	33	29.7	Yes	No	Primary	Urban	Yes	No	No	No	No	No	No	No	No	No	No	No	No	No	No	No	No	No	No	No	No	No	No	No	No
407	Female	18	28.5	No	No	Secondary	Urban	No	No	No	No	Yes	No	No	No	No	No	No	No	No	No	No	No	No	No	No	No	No	No	No	No	No
408	Female	19	29.3	No	Yes	Primary	Urban	No	No	No	No	No	No	No	No	No	No	No	No	No	No	No	No	No	No	No	No	No	No	No	No	No
409	Female	20	28.1	No	No	No studies	Urban	No	No	No	No	No	No	No	No	No	No	No	No	No	No	No	No	No	No	No	Yes	No	No	No	No	No
410	Female	34	29	Yes	Yes	Secondary	Urban	No	No	No	No	No	No	No	No	No	No	No	No	No	No	No	No	No	No	No	Yes	No	No	No	No	Yes
411	Female	29	29.3	No	No	Secondary	Urban	No	No	No	No	No	No	No	No	No	No	No	No	No	No	No	No	No	No	No	No	No	No	No	No	No
412	Female	50	29.8	No	Yes	No studies	Urban	No	No	No	No	No	No	No	No	No	No	No	No	No	Yes	No	No	No	No	No	No	No	No	No	No	No
413	Female	63	25.4	Yes	No	Primary	Urban	No	No	No	No	Yes	No	No	No	No	No	No	No	No	No	No	No	No	No	No	No	No	No	No	No	No
414	Female	23	26.3	No	Yes	University	Rural	No	Yes	No	No	No	No	No	No	No	No	No	No	No	No	No	No	No	No	No	No	No	No	No	No	No
415	Female	32	27.9	No	No	Primary	Urban	No	No	No	No	No	No	No	No	No	No	No	Yes	No	No	No	No	No	No	No	No	No	No	No	No	No
416	Female	53	25.4	No	No	Secondary	Urban	Yes	No	No	No	No	No	No	No	No	No	No	No	No	No	No	No	No	No	No	No	No	No	No	No	No
417	Female	39	27.8	No	Yes	Primary	Urban	No	No	No	No	No	No	No	No	No	No	No	No	No	Yes	No	No	No	No	No	No	No	No	No	No	No
418	Female	44	26.3	No	No	University	Urban	No	No	No	No	No	No	No	No	No	No	Yes	No	No	No	No	No	No	No	No	No	No	No	No	No	No
419	Female	46	26.2	Yes	Yes	Secondary	Urban	No	No	No	No	No	No	No	No	No	No	No	No	No	No	No	No	No	No	No	No	No	No	No	No	No
420	Female	61	26.8	No	Yes	No studies	Urban	No	No	No	No	No	No	No	No	No	No	No	No	No	No	No	No	No	No	No	No	No	No	No	No	No
421	Female	37	29.1	Yes	No	University	Urban	No	No	No	No	No	No	No	No	No	No	No	Yes	No	No	No	No	No	No	No	No	No	No	No	No	No
422	Female	38	25.3	No	Yes	Primary	Urban	No	No	No	No	No	No	No	No	No	No	No	No	No	No	No	No	No	No	No	No	No	No	No	No	No
423	Female	48	29	No	Yes	University	Urban	No	No	No	No	No	No	No	No	No	No	No	No	No	No	No	No	No	No	No	No	No	No	No	No	No
424	Female	40	29.8	No	No	Primary	Urban	No	No	No	No	No	No	No	No	No	No	No	No	No	No	Yes	No	No	No	No	No	No	No	No	No	No
425	Female	42	29.7	No	Yes	University	Urban	Yes	No	No	No	No	Yes	No	No	No	No	No	No	No	No	No	No	No	No	No	No	No	No	No	No	No
426	Female	22	26.1	Yes	No	No studies	Urban	No	No	No	No	No	No	No	No	No	No	No	No	No	No	No	No	No	No	No	No	No	No	No	No	Yes
427	Female	18	28	No	Yes	Primary	Urban	No	Yes	No	No	No	No	No	No	No	No	No	No	No	No	No	No	No	No	No	No	No	No	No	No	No
428	Female	25	25.3	No	No	Secondary	Urban	No	No	No	No	No	No	No	No	No	No	No	No	No	No	No	No	No	No	No	No	No	No	No	No	No
429	Female	29	26.7	No	No	Primary	Urban	No	No	No	No	No	No	No	No	No	No	No	No	No	No	No	No	No	No	No	No	No	No	No	No	No
430	Female	52	28.8	Yes	No	No studies	Urban	No	No	No	No	No	No	No	No	No	No	Yes	No	No	No	No	No	No	No	No	No	No	No	No	No	No
431	Female	47	27.3	No	Yes	University	Urban	No	No	No	No	No	No	No	No	No	No	No	No	No	No	No	No	No	No	No	No	No	No	No	No	No
432	Female	38	29.1	No	No	Secondary	Urban	Yes	No	No	No	No	No	No	No	No	No	No	No	No	No	No	No	No	No	No	No	Yes	No	No	No	No
433	Female	23	23.8	No	Yes	Primary	Rural	No	No	No	No	No	No	No	No	No	No	No	No	No	Yes	No	No	No	No	No	No	No	No	No	No	No
434	Female	27	28.2	No	No	No studies	Urban	No	No	No	No	No	No	No	No	No	No	No	No	No	No	No	No	No	No	No	No	No	No	No	No	No
435	Female	54	27.1	No	No	Primary	Urban	Yes	No	No	No	No	No	No	No	No	No	No	No	No	No	No	No	No	No	No	No	No	No	No	No	No
436	Female	38	25.2	No	Yes	Secondary	Urban	No	No	No	No	No	No	No	No	No	Yes	No	No	No	No	No	No	No	No	No	No	No	No	No	No	No
437	Female	42	28.2	Yes	No	Primary	Urban	No	No	No	No	No	No	No	No	No	No	No	No	No	Yes	No	No	No	No	No	No	No	No	No	No	No
438	Female	49	29.9	No	Yes	University	Urban	No	No	No	No	No	Yes	No	No	No	No	No	No	No	No	No	No	No	No	No	No	No	No	No	No	No
439	Female	35	26.1	No	No	Secondary	Urban	No	No	No	No	No	No	No	No	No	No	No	No	No	No	No	No	No	No	No	No	No	No	No	No	No
440	Female	18	28.3	No	No	University	Urban	No	Yes	No	No	No	No	No	No	No	No	No	No	No	No	No	No	No	No	No	No	No	No	No	No	No
441	Female	21	25.2	No	No	No studies	Rural	No	No	No	No	No	No	No	No	No	No	No	No	No	No	No	No	No	No	No	No	No	No	No	No	Yes
442	Female	23	28.4	No	No	Primary	Urban	No	No	No	No	No	No	No	No	No	No	No	No	No	No	No	No	No	No	No	No	No	No	No	No	No
443	Female	34	27.8	No	Yes	Primary	Urban	No	No	No	No	No	No	No	No	No	No	Yes	No	No	No	No	No	No	No	No	No	No	No	No	No	No
444	Female	19	28.3	No	No	Primary	Urban	No	No	No	No	No	No	No	No	No	No	No	No	No	No	No	No	No	No	No	No	No	No	No	No	No
445	Female	23	29.2	No	Yes	Primary	Urban	No	No	No	No	No	No	No	No	No	No	No	No	No	No	No	No	No	No	No	No	No	No	No	No	No
446	Female	62	29.3	Yes	No	Primary	Urban	No	No	No	No	No	No	No	No	No	No	No	No	No	No	No	No	No	No	No	No	No	No	No	No	No
447	Female	38	28.7	No	No	Secondary	Urban	Yes	No	No	No	No	No	No	No	No	No	No	No	No	No	No	No	No	No	No	Yes	No	No	No	No	No
448	Female	26	28	No	Yes	Primary	Urban	No	No	No	No	No	No	No	No	No	No	No	No	No	No	No	No	No	No	No	No	No	No	No	No	No
449	Female	35	28.9	No	No	Primary	Urban	No	No	No	No	No	No	No	No	No	No	No	No	No	No	No	No	No	No	No	No	No	No	No	No	No
450	Female	41	29.8	No	No	Primary	Urban	No	No	No	No	No	No	No	No	No	No	No	No	No	No	No	No	No	No	No	No	Yes	No	No	No	No
451	Male	57	38.9	Yes	Yes	Primary	Urban	No	No	No	No	No	No	No	No	No	No	No	No	No	No	No	No	No	No	No	Yes	No	No	No	No	Yes
452	Male	42	40.3	No	No	Secondary	Rural	No	Yes	No	No	No	No	No	No	No	No	No	No	No	Yes	No	No	No	No	No	No	No	No	No	No	No
453	Male	43	43.4	Yes	Yes	No studies	Urban	No	No	No	No	Yes	No	No	No	No	No	No	No	No	No	No	No	No	No	No	No	No	No	No	No	No
454	Male	35	36.8	No	No	Primary	Urban	No	Yes	No	No	No	No	No	No	No	No	No	No	No	No	Yes	No	No	No	No	No	No	No	No	No	No
455	Male	51	33.5	No	No	Secondary	Rural	No	No	No	No	No	No	No	No	No	Yes	No	No	No	No	No	No	No	No	No	No	No	No	No	No	No
456	Male	47	37.9	No	Yes	No studies	Urban	No	No	No	No	No	No	No	No	No	No	No	No	No	Yes	No	No	No	No	No	No	No	No	No	No	No
457	Male	53	41.2	Yes	Yes	University	Urban	Yes	Yes	No	No	No	No	No	No	No	No	No	Yes	No	No	No	No	No	No	No	No	No	No	No	No	No
458	Male	39	42.3	Yes	No	University	Urban	No	No	No	No	No	No	No	No	No	No	No	No	No	No	No	No	No	No	No	No	No	No	No	No	No
459	Male	52	36.8	No	No	No studies	Urban	No	No	No	No	No	No	No	No	No	No	No	No	No	Yes	No	No	No	No	No	No	No	No	No	No	Yes
460	Male	29	41.8	No	Yes	Secondary	Urban	Yes	No	No	No	No	No	No	No	No	No	No	No	No	No	Yes	No	No	No	No	No	No	No	No	No	No
461	Male	52	37.5	No	No	No studies	Urban	No	Yes	Yes	No	No	No	No	No	No	No	No	No	No	No	No	No	No	No	No	No	Yes	No	No	No	Yes
462	Male	62	35	No	No	Primary	Urban	No	No	No	No	No	No	No	No	No	No	No	No	No	No	No	No	No	No	No	No	No	No	No	No	Yes
463	Male	38	45.6	No	Yes	No studies	Urban	No	No	No	No	No	No	No	No	No	No	No	Yes	No	No	No	No	No	No	No	No	No	No	No	No	No
464	Male	49	38.9	No	No	University	Urban	No	Yes	No	No	No	No	No	No	No	No	No	No	No	No	No	No	No	No	No	No	No	No	No	No	No
465	Male	51	46.3	No	No	Primary	Rural	No	No	No	No	No	No	No	No	No	No	No	No	No	Yes	No	No	No	No	No	No	No	No	No	No	Yes
466	Male	34	39.1	No	No	No studies	Rural	Yes	No	No	No	No	No	No	No	No	Yes	No	No	No	No	No	No	No	No	No	No	No	No	No	No	Yes
467	Male	46	45.2	No	Yes	Primary	Urban	No	No	No	No	No	No	No	No	No	No	No	No	No	No	No	No	No	No	No	Yes	No	No	No	No	No
468	Male	42	32.8	No	No	No studies	Urban	No	No	No	No	No	No	No	No	No	No	No	No	No	No	No	No	No	No	No	No	No	No	No	No	No
469	Male	32	43.7	No	No	No studies	Urban	No	No	No	No	No	No	No	No	No	No	No	No	No	No	Yes	No	No	No	No	No	No	No	No	No	No
470	Male	33	40.5	No	No	Secondary	Urban	No	No	No	No	No	No	No	No	No	No	No	No	No	No	No	No	No	No	No	No	No	No	No	No	No
471	Male	47	43.8	No	No	No studies	Urban	Yes	Yes	No	No	No	No	No	No	No	No	No	No	No	Yes	No	No	No	No	No	No	No	No	No	No	Yes
472	Male	43	41.8	No	No	Secondary	Urban	No	No	No	No	No	No	No	No	No	No	No	No	No	No	No	No	No	No	No	Yes	No	No	No	No	No
473	Male	61	47.1	Yes	Yes	Primary	Rural	Yes	No	No	No	No	No	No	No	No	No	No	No	No	No	No	No	No	No	No	No	No	No	No	No	No
474	Male	32	40.9	No	No	Primary	Urban	No	No	No	No	No	No	No	No	No	No	No	Yes	No	No	No	No	No	No	No	No	No	No	No	No	No
475	Male	36	35.1	No	Yes	University	Urban	No	No	No	No	No	No	No	No	No	No	No	No	No	No	Yes	No	No	No	No	No	Yes	No	No	No	Yes
476	Male	58	37.6	No	No	Secondary	Urban	No	Yes	No	No	No	No	No	No	No	No	No	Yes	No	No	No	No	No	No	No	No	No	No	No	No	Yes
477	Male	44	41.2	No	Yes	Primary	Urban	Yes	No	No	No	No	No	No	No	No	No	No	No	No	Yes	No	No	No	No	No	No	No	No	No	No	Yes
478	Male	42	35.9	No	No	No studies	Rural	No	Yes	No	No	No	No	No	No	No	No	No	No	No	No	No	No	No	No	No	Yes	No	No	No	No	Yes
479	Male	40	40.6	No	No	Secondary	Urban	Yes	No	No	No	No	No	No	No	No	No	No	No	No	Yes	No	No	No	No	No	No	No	No	No	No	No
480	Male	39	34.1	No	Yes	Secondary	Urban	No	Yes	No	No	No	No	No	No	No	No	No	No	No	No	No	No	No	No	No	Yes	No	No	No	No	No
481	Male	28	37.8	No	No	Primary	Urban	No	No	No	No	No	No	No	No	No	No	No	Yes	No	No	Yes	No	No	No	No	No	No	No	No	No	No
482	Male	43	40.9	No	No	No studies	Rural	Yes	No	Yes	No	No	No	No	No	No	No	No	No	No	No	No	No	No	No	No	No	No	No	No	No	No
483	Male	60	38.1	No	No	University	Urban	No	Yes	No	Yes	No	No	No	No	No	No	No	No	No	No	No	No	No	No	No	No	Yes	No	No	No	No
484	Male	41	41.2	Yes	Yes	Primary	Urban	Yes	No	No	No	No	No	No	No	No	No	No	No	No	No	No	No	No	No	No	No	No	No	No	No	No
485	Male	42	42.1	Yes	No	Secondary	Urban	No	No	No	No	No	No	No	No	No	No	No	No	No	No	Yes	No	No	No	No	No	No	No	No	No	No
486	Male	39	39.7	No	No	Primary	Rural	No	No	No	No	No	No	No	No	No	No	No	No	No	Yes	No	No	No	No	No	No	No	No	No	No	No
487	Male	43	43.5	No	No	No studies	Urban	Yes	No	No	No	No	No	No	No	No	No	No	No	No	No	No	No	No	No	No	Yes	No	No	No	No	Yes
488	Male	45	39.1	No	No	Primary	Urban	No	No	No	No	No	No	No	No	No	No	No	No	No	No	No	No	No	No	No	No	No	No	No	No	No
489	Male	38	40.3	No	Yes	No studies	Rural	No	Yes	No	No	No	No	No	No	No	No	No	No	No	Yes	No	No	No	No	No	No	No	No	No	No	No
490	Male	43	33.8	No	No	Primary	Urban	No	No	Yes	No	No	No	No	No	No	No	No	No	No	No	No	No	No	No	No	No	Yes	No	Yes	No	No
491	Male	29	37.6	No	No	Secondary	Urban	No	No	No	No	No	No	No	No	No	No	No	No	No	No	No	No	No	No	No	Yes	No	No	No	No	Yes
492	Male	33	38.6	No	Yes	No studies	Urban	No	No	No	No	No	No	No	No	No	No	No	Yes	No	No	No	No	No	No	No	No	No	No	No	No	No
493	Male	46	46.7	No	No	University	Urban	Yes	No	No	No	No	No	No	No	No	No	No	No	No	No	Yes	No	No	No	No	No	No	No	No	No	No
494	Male	35	39.7	No	No	No studies	Urban	No	Yes	No	No	No	No	No	No	No	No	No	No	No	No	No	No	No	No	No	Yes	No	No	No	No	No
495	Male	43	47.1	Yes	Yes	Primary	Urban	Yes	No	No	No	No	No	No	No	No	Yes	No	No	No	No	No	No	No	No	No	No	No	No	No	No	No
496	Male	41	38.6	No	No	No studies	Rural	No	No	No	No	No	No	No	No	No	No	No	No	No	No	No	No	No	No	No	No	No	No	No	No	No
497	Male	40	42.6	Yes	Yes	Primary	Urban	No	No	No	No	No	No	No	No	No	No	No	Yes	No	No	No	No	No	No	No	No	No	No	No	No	No
498	Male	56	41.8	Yes	No	No studies	Urban	No	No	No	No	No	No	No	No	No	No	No	No	No	No	No	No	No	No	No	No	Yes	No	No	No	No
499	Female	46	36.8	No	Yes	Secondary	Urban	No	No	No	No	No	No	No	No	No	No	No	No	No	Yes	No	No	No	No	No	No	No	No	No	No	No
500	Female	55	41.8	No	No	Primary	Urban	Yes	No	No	No	No	No	No	No	No	No	No	No	No	No	No	No	No	No	No	No	No	No	No	No	No
501	Female	60	38.4	No	No	No studies	Urban	No	Yes	No	No	No	No	No	No	No	No	No	No	No	No	No	Yes	No	No	No	Yes	No	No	No	No	Yes
502	Female	59	39.2	No	No	Primary	Urban	No	Yes	No	Yes	No	No	No	No	No	No	No	No	No	No	No	No	No	No	No	No	Yes	No	No	No	No
503	Female	61	41.5	No	No	No studies	Rural	Yes	No	No	No	No	No	No	No	No	No	No	Yes	No	No	No	No	No	No	No	No	No	No	No	No	Yes
504	Female	52	38.5	No	No	No studies	Urban	No	No	No	No	No	No	No	No	No	No	Yes	No	No	No	No	No	No	No	No	No	No	No	No	No	Yes
505	Female	32	34.9	Yes	Yes	University	Rural	No	Yes	No	No	No	No	No	No	No	No	No	No	No	Yes	No	No	No	No	No	No	No	No	No	No	No
506	Female	54	44.5	No	No	No studies	Urban	No	No	No	No	No	No	No	No	No	No	No	No	No	No	No	No	No	No	No	Yes	No	No	No	No	No
507	Female	45	47.6	No	No	Primary	Urban	Yes	No	No	No	No	No	No	No	No	No	No	No	No	No	No	No	No	No	No	No	No	No	No	No	No
508	Female	43	48.4	No	No	Primary	Urban	No	Yes	No	No	No	No	No	No	No	No	No	No	No	No	Yes	No	No	No	No	No	No	No	No	No	Yes
509	Female	38	40.7	Yes	Yes	University	Urban	No	No	No	No	No	No	No	No	No	No	No	No	No	No	No	No	No	No	No	No	No	No	No	No	Yes
510	Female	51	39.8	No	No	No studies	Urban	No	No	No	Yes	No	No	No	No	No	No	No	No	No	No	No	No	No	No	No	No	No	No	No	No	No
511	Female	29	39.3	Yes	Yes	Secondary	Urban	No	Yes	No	No	No	No	No	No	No	No	No	No	No	No	No	No	No	No	No	No	Yes	No	No	No	Yes
512	Female	31	33.8	No	No	No studies	Urban	No	No	No	No	No	No	No	No	No	No	No	No	No	Yes	No	No	No	No	No	No	No	No	No	No	No
513	Female	45	39.8	No	No	No studies	Urban	No	No	No	No	No	No	No	No	No	No	No	No	No	No	No	No	No	No	No	Yes	No	No	No	No	No
514	Female	61	43.6	No	No	No studies	Urban	Yes	No	No	No	No	No	No	No	No	No	No	No	No	No	No	No	No	No	No	No	No	No	No	No	Yes
515	Female	47	38.3	No	No	Primary	Rural	No	Yes	No	No	No	No	No	No	No	No	No	No	No	Yes	No	No	No	No	No	No	No	No	No	No	No
516	Female	29	34.5	No	No	Primary	Urban	No	No	No	No	No	No	No	No	No	No	No	No	No	No	No	No	No	No	No	No	No	No	No	No	No
517	Female	40	42.8	No	No	No studies	Urban	Yes	No	No	No	No	No	No	No	No	No	No	No	No	No	No	No	No	No	No	Yes	No	No	No	No	No
518	Female	57	40.9	No	No	No studies	Urban	No	Yes	No	No	No	No	No	No	No	No	No	No	No	No	No	No	No	No	No	No	No	No	No	No	No
519	Female	63	35.3	No	No	No studies	Urban	No	No	No	No	No	No	No	No	No	No	No	No	No	No	No	No	No	No	No	No	No	No	No	No	No
520	Female	29	33.8	Yes	Yes	Secondary	Urban	No	No	No	No	No	No	No	No	No	No	No	No	No	No	No	No	No	No	No	No	No	No	No	No	No
521	Female	41	41.8	No	No	No studies	Urban	No	No	No	Yes	No	No	No	No	No	No	No	No	No	No	No	No	No	No	No	No	Yes	No	No	No	Yes
522	Female	30	39.4	No	No	No studies	Rural	Yes	No	No	No	No	No	No	No	No	No	No	No	No	No	No	No	No	No	No	No	No	No	No	No	Yes
523	Female	44	35.1	No	Yes	Secondary	Rural	No	No	No	No	No	No	No	No	No	No	No	No	No	No	No	No	No	No	No	Yes	No	No	No	No	Yes
524	Female	43	40.9	No	No	No studies	Urban	No	Yes	No	No	No	No	No	No	No	No	No	Yes	No	No	No	No	No	No	No	No	Yes	No	No	No	Yes
525	Female	41	38.7	No	No	Primary	Urban	No	No	No	No	No	No	No	No	No	No	No	No	No	Yes	No	No	No	No	No	No	No	No	No	No	No
526	Female	29	32.3	No	No	No studies	Urban	No	No	No	No	No	No	No	No	No	No	No	No	No	No	Yes	No	No	No	No	No	No	No	No	No	No
527	Female	36	41.1	No	No	Primary	Rural	No	Yes	No	No	No	No	No	No	No	No	No	No	No	No	No	No	No	No	No	Yes	No	No	No	No	Yes
528	Female	38	42.01	Yes	Yes	University	Urban	No	No	No	No	No	No	No	No	No	No	No	No	No	No	No	No	No	No	No	No	No	No	No	No	No
529	Female	43	42.87	No	No	Primary	Urban	No	No	No	No	No	No	No	No	No	No	No	No	No	No	Yes	No	No	No	No	No	No	No	No	No	Yes
530	Female	44	44.35	No	No	No studies	Urban	Yes	No	No	No	No	No	No	No	No	No	No	No	No	No	No	No	No	No	No	Yes	No	No	No	No	No
531	Female	39	43.9	No	No	No studies	Urban	No	Yes	No	No	Yes	No	No	No	No	No	No	No	No	No	No	No	No	No	No	No	No	No	No	No	Yes
532	Female	37	47.8	No	No	No studies	Urban	No	No	No	No	No	No	No	No	No	No	No	No	No	Yes	No	No	No	No	No	No	No	No	No	No	Yes
533	Female	28	35.1	Yes	Yes	University	Urban	No	Yes	No	No	No	No	No	No	No	No	No	Yes	No	No	No	No	No	No	No	No	No	No	No	No	No
534	Female	43	44.3	No	No	No studies	Urban	No	No	No	No	No	No	No	No	No	No	No	No	No	No	No	No	No	No	No	No	No	No	No	No	No
535	Female	45	38.2	No	No	Primary	Urban	No	No	No	No	No	No	No	No	No	No	No	No	No	No	No	No	No	No	No	No	No	No	No	No	No
536	Female	51	37.9	No	No	No studies	Urban	No	No	No	No	Yes	No	No	No	No	No	No	No	No	No	No	No	No	No	No	No	No	No	No	No	No
537	Female	59	39.7	No	No	Primary	Urban	No	Yes	No	No	No	No	No	No	No	No	No	No	No	No	No	No	No	No	No	No	No	No	No	No	No
538	Female	60	36.8	No	No	No studies	Urban	No	No	No	No	No	No	No	No	No	No	No	No	No	No	No	No	No	No	No	No	Yes	No	No	No	Yes
539	Female	39	37.9	Yes	Yes	Secondary	Urban	No	No	No	No	No	No	No	No	No	No	No	No	No	No	Yes	No	No	No	No	No	No	No	No	No	No
540	Female	41	40.3	No	No	No studies	Urban	Yes	No	No	No	No	No	No	No	No	No	No	No	No	No	No	No	No	No	No	No	No	No	No	No	No
541	Female	43	35.2	No	No	No studies	Urban	No	Yes	No	No	No	No	No	No	No	No	No	No	No	No	No	No	No	No	No	No	No	No	No	No	No
542	Female	29	34.8	Yes	Yes	Secondary	Urban	No	No	No	No	No	No	No	No	No	No	No	No	No	No	No	No	No	No	No	Yes	No	No	No	No	No
543	Female	35	43.4	No	No	No studies	Rural	No	Yes	No	No	No	No	No	No	No	No	No	No	No	Yes	No	No	No	No	No	No	No	No	No	No	Yes
544	Female	38	46.9	No	No	No studies	Urban	Yes	No	No	No	No	No	No	No	No	No	No	No	No	No	No	No	No	No	No	No	No	No	No	No	No
545	Female	41	47.6	No	No	No studies	Rural	Yes	No	No	No	No	No	No	No	No	No	No	No	No	Yes	No	No	No	No	No	No	No	No	No	No	No
546	Female	43	44.5	No	No	Primary	Urban	No	Yes	No	No	No	No	No	No	No	No	No	No	No	No	No	No	No	No	No	No	No	No	No	No	No
547	Female	45	41.2	No	No	Primary	Urban	No	Yes	No	No	No	No	No	No	No	No	No	No	No	Yes	No	No	No	No	No	No	No	No	No	No	No
548	Female	58	47.3	No	No	No studies	Urban	Yes	No	No	No	No	No	No	No	No	No	No	No	No	No	No	No	No	No	No	No	No	No	No	No	Yes
549	Female	62	44.5	Yes	Yes	University	Rural	No	No	No	No	No	No	No	No	No	No	No	No	No	No	No	No	No	No	No	No	No	No	No	No	No
550	Female	42	36.9	No	No	No studies	Urban	No	No	No	No	No	No	No	No	No	No	No	No	No	No	Yes	No	No	No	No	No	No	No	No	No	Yes
551	Female	38	39.8	No	No	Primary	Urban	No	Yes	No	No	Yes	No	No	No	No	No	No	No	No	No	No	No	No	No	No	No	No	No	No	No	No
552	Female	43	41.7	No	No	No studies	Urban	No	No	No	No	No	No	No	No	No	No	Yes	No	No	No	No	No	No	No	No	No	No	No	No	No	No
553	Female	41	46.8	No	No	No studies	Rural	Yes	No	No	No	No	No	No	No	No	No	No	No	No	No	No	No	No	No	No	Yes	No	No	No	No	Yes
554	Female	38	45.7	Yes	Yes	University	Urban	No	Yes	No	No	No	No	No	No	No	No	No	No	No	Yes	No	No	No	No	No	No	No	No	No	No	No
555	Female	53	48.03	No	No	No studies	Urban	Yes	No	No	No	No	No	No	No	No	No	No	No	No	No	No	No	No	No	No	No	Yes	No	No	No	Yes
556	Female	48	46.32	No	No	No studies	Urban	No	No	No	No	Yes	No	No	No	No	No	No	No	No	No	No	No	No	No	No	No	No	No	No	No	No
557	Female	29	32.3	Yes	Yes	Secondary	Urban	No	No	No	No	No	No	No	No	No	No	No	No	No	No	No	No	No	No	No	No	No	No	No	No	No
558	Female	38	47.3	No	No	No studies	Urban	No	Yes	No	No	No	No	No	No	No	No	No	No	No	No	No	No	No	No	No	Yes	No	No	No	No	No
559	Female	37	38.7	No	No	Primary	Urban	No	No	No	No	No	No	No	No	No	No	No	No	No	No	No	No	No	No	No	No	No	No	No	No	No
560	Female	41	40.4	No	No	No studies	Rural	No	No	No	No	No	No	No	No	No	No	No	No	No	No	Yes	No	No	No	No	No	No	No	No	No	No
561	Female	53	45.9	No	No	No studies	Urban	Yes	No	No	No	No	No	No	No	No	No	No	No	No	No	No	No	No	No	No	No	Yes	No	No	No	Yes
562	Female	29	37.9	No	No	Primary	Urban	No	No	No	No	No	No	No	No	No	No	No	No	No	No	No	No	No	No	No	No	No	No	No	No	No
563	Female	38	41.3	No	No	No studies	Urban	No	Yes	No	No	No	No	No	No	No	No	No	No	No	Yes	No	No	No	No	No	No	No	No	No	No	Yes
